# Supplementary material for: Information-based autonomous reconfiguration in systems of interacting DNA nanostructures
Source: Springer Nature journal article supplement (doi:10.1038/s41467-018-07805-7), 2018-12-12
Supplement: MOESM1 [file 41467_2018_7805_MOESM1_ESM.pdf]

# Information-based autonomous reconfiguration in systems of interacting DNA nanostructures

Petersen et al.

## Supplementary Figures

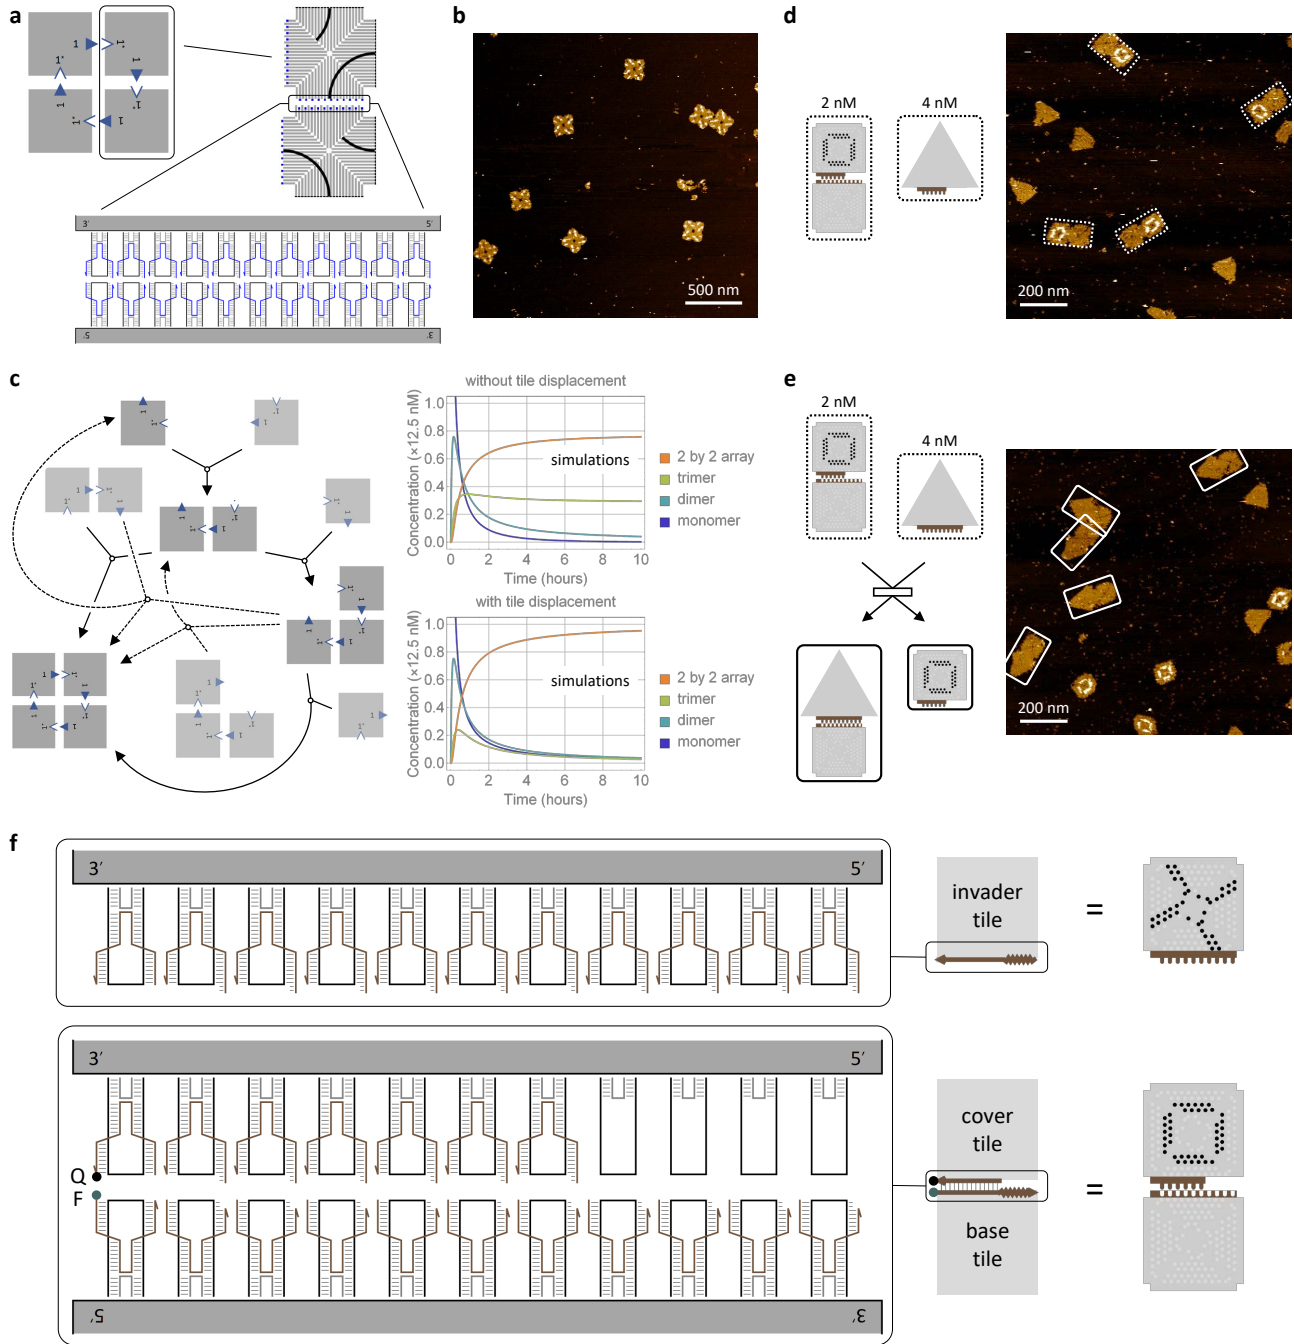

**Supplementary Figure 1 | Discovery of DNA tile displacement.** (a) A 2 by 2 array design that uses one tile with 11 edge staples along two edges. Each staple has a stacking bond and a 1-nt sticky end. (b) AFM image of the 2 by 2 array, with 50 nM of the tile annealed from 90 to 20 °C at 6 sec per 0.1 °C. (c) Possible self-assembly pathways without (solid arrows) and with (dotted arrows) tile displacement. Fainter tiles are duplicate and rotated representations of the same monomer, dimer or trimer. Simulations were performed with all possible reactions at the same effective rate  $k = 2.5 \times 10^4 \text{ M}^{-1}\text{s}^{-1}$ , which is the binding rate (and maximum effective tile displacement rate) for tiles with 1-nt sticky ends in the model shown in Fig. 1e. Simulations suggest that, if all bindings are irreversible, then without tile displacement, monomer depletion will prevent trimers from further converting to 2 by 2 arrays and lead to a significant fraction of kinetically trapped trimers at the end point. With tile displacement, a trimer could interact with a dimer to form a 2 by 2 array while releasing a monomer, and two copies of trimers could interact with each other to form a 2 by 2 array while releasing a dimer, resulting in nearly 100% of 2 by 2 arrays at the end point. (d) Design diagram and AFM image of a square dimer mixed together with an triangular invader<sup>1</sup> without a toehold and (e) with a toehold. Experiments were performed at 25 °C with 2 nM square dimer and 4 nM triangular invader. AFM images were collected after 48 hours. Dotted and solid boxes highlight reactants and products, respectively. (f) Edge staples composing the toehold and branch migration domains of a tile displacement reaction shown in Fig. 1c.

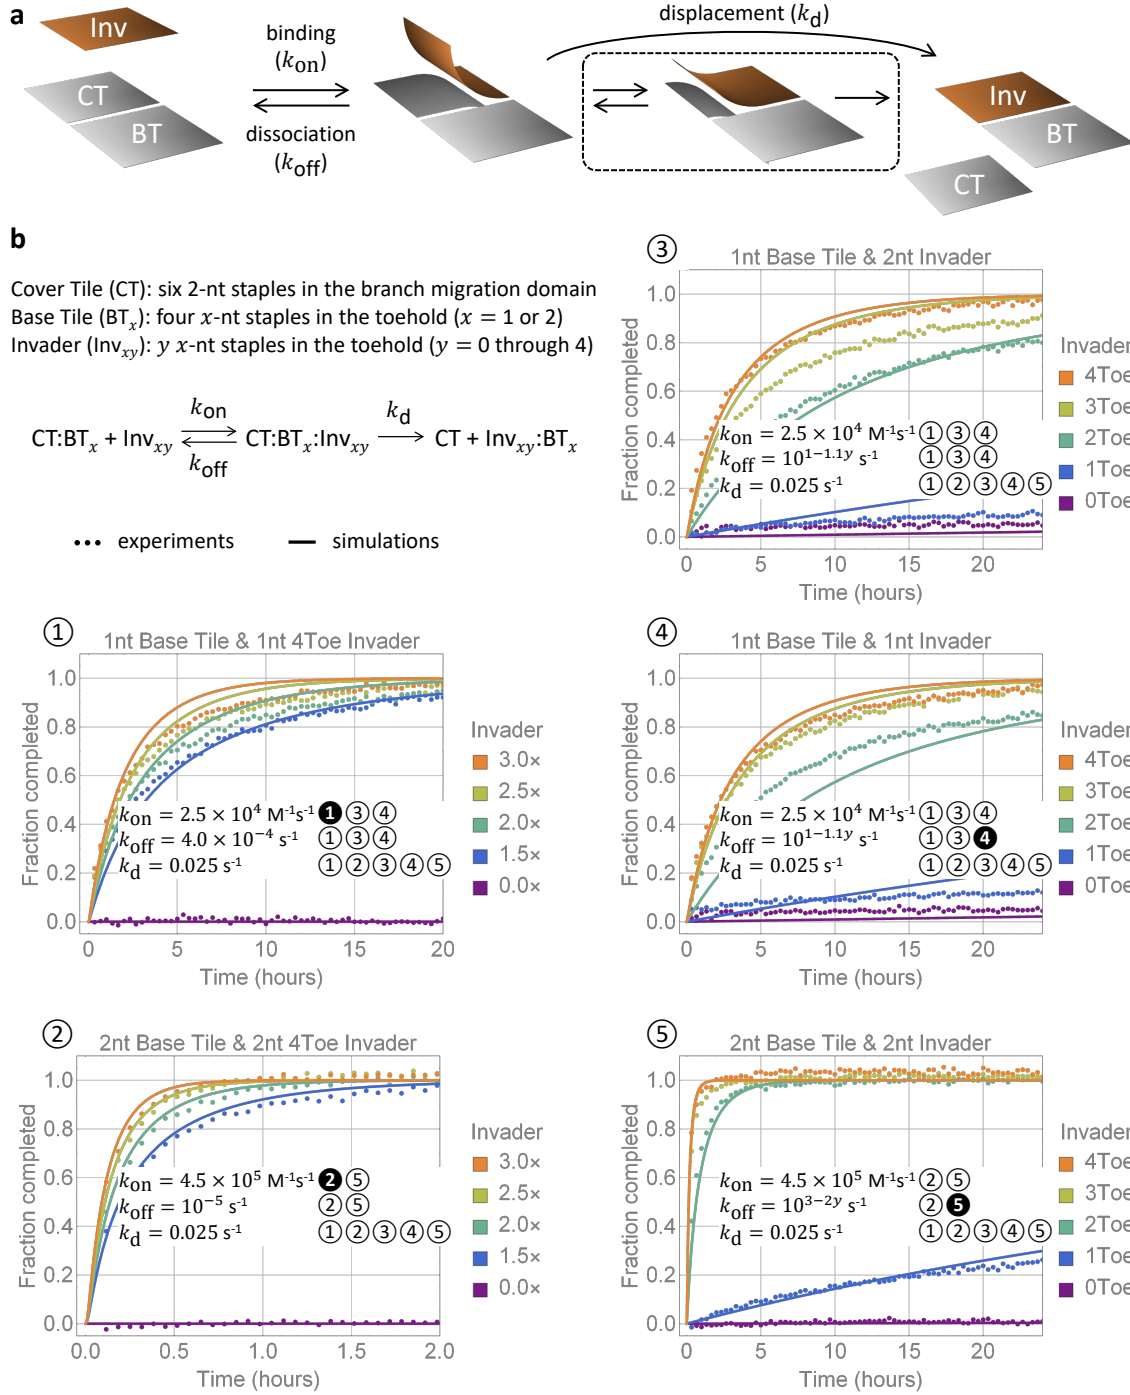

**Supplementary Figure 2 | Kinetics of DNA tile displacement.** (a) The pathway of a tile displacement reaction. Dotted box highlights an intermediate state of the displacement step. (b) Fluorescence kinetics experiments and simulations. Experiments were performed at 25 °C with 2 nM (1×) cover:base dimer and 4 nM (2×) invader (or otherwise specified invader concentrations in the plot legend).  $k_{\text{on}}$ ,  $k_{\text{off}}$ , and  $k_d$  are the rates of binding, dissociation, and displacement, respectively. Numbers next to the rates indicate the plots for which each rate is associated with, and the highlighted numbers indicate the plot for which the rate was largely derived from.

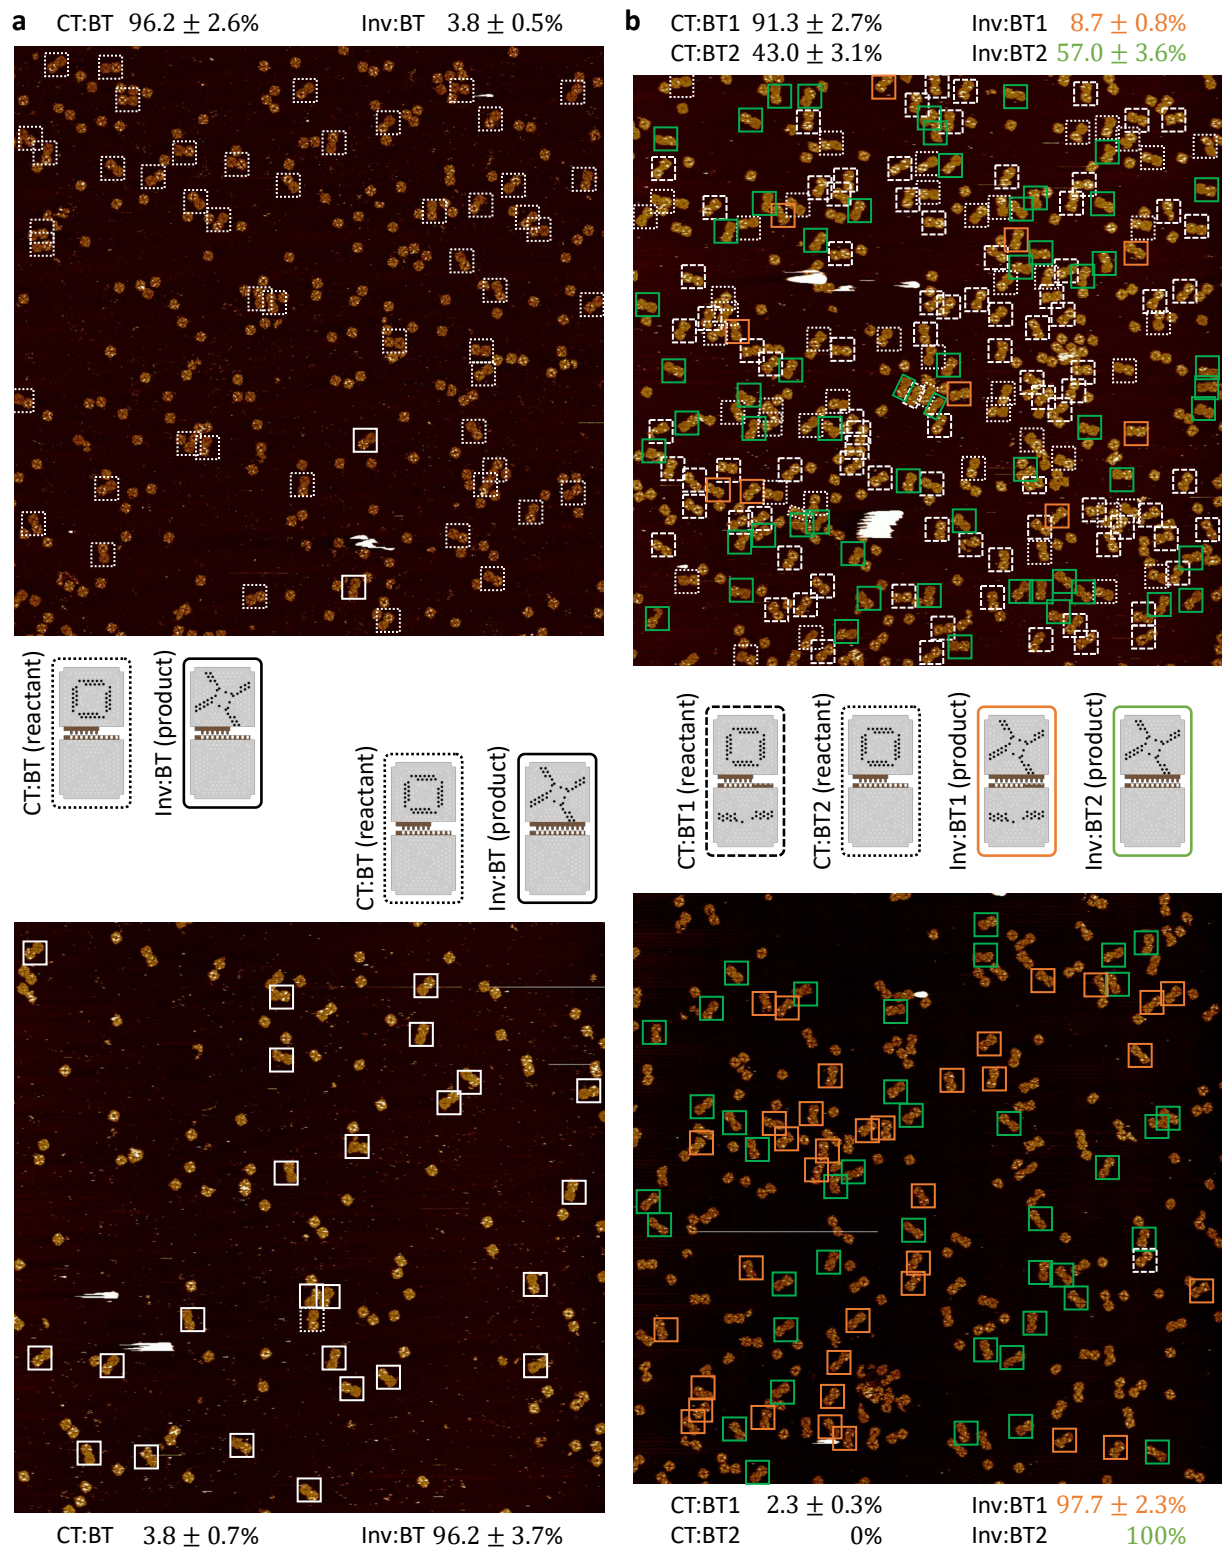

**Supplementary Figure 3 | Yield estimation of basic and competitive tile displacement.** (a) Cover:base tile complex mixed together with an invader without (top) and with (bottom) a toehold. (b) Two types of cover:based tile complexes mixed together with 0.6 $\times$  (top) and 3 $\times$  (bottom) invader. All AFM images are 5 by 5  $\mu\text{m}$ . Each two-tile complex is highlighted as either a reactant (dotted boxes) or a product (solid boxes). The yield of each tile displacement reaction was estimated as  $p = m/n$ , where  $m$  is the total number of products and  $n$  is the total number of reactants and products counted in each image. Ambiguous and spurious structures were not counted. The standard error was calculated as  $p\sqrt{1-p}/\sqrt{n}$ , treating the yield as a Bernoulli probability.<sup>2</sup>



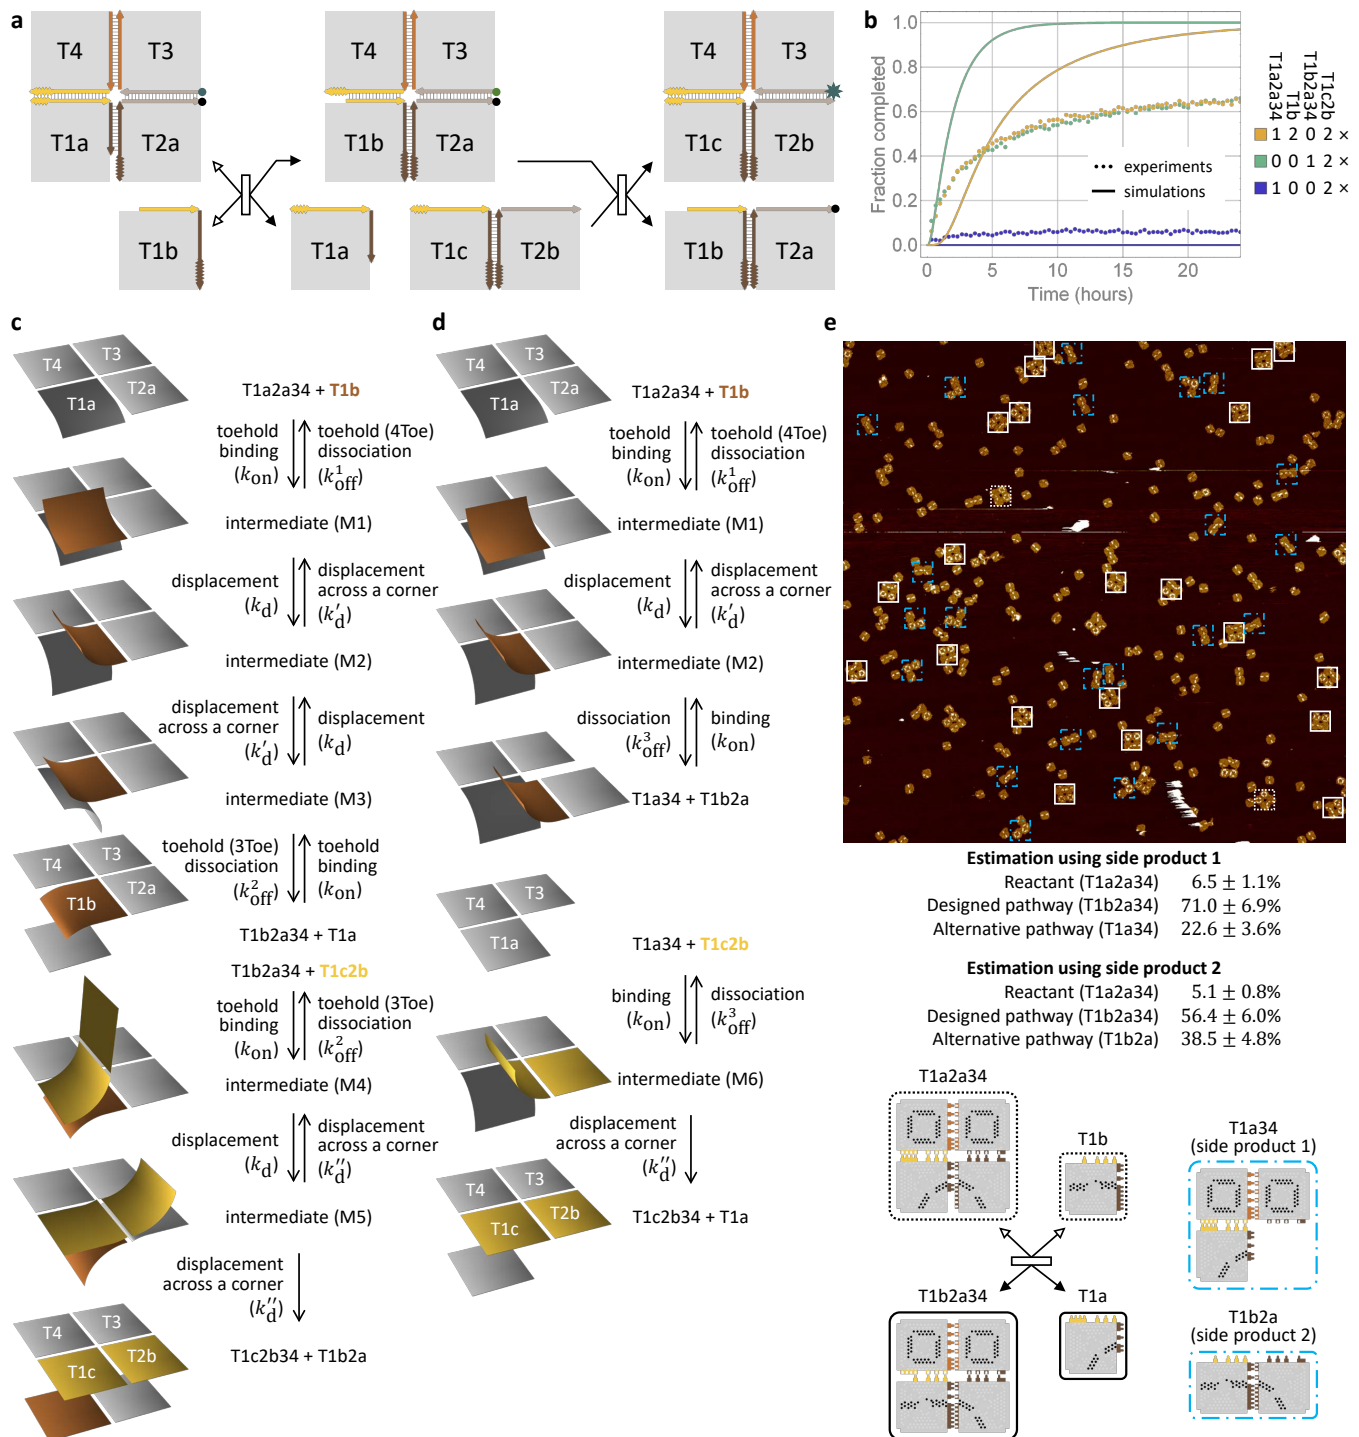

**Supplementary Figure 4 | An earlier design of sequential reconfiguration.** (a) Domain-level design diagram. (b) Fluorescence kinetics experiments and simulations. (c) Designed pathway. The first invader (T1b) displaces one tile from the 2 by 2 array, and then the second invader (T1c2b) displaces two tiles. (d) Alternative pathway. The first invader removes one tile from the 2 by 2 array, and then the second invader displaces another tile. (e) AFM image and yield estimation of the designed and alternative pathways in the first step of sequential tile displacement. The AFM image is 5 by 5  $\mu\text{m}$ . Each 2 by 2 array is highlighted as either a reactant (dotted boxes) or a product (solid boxes). Two types of side products of the alternative pathway are also highlighted (dashed blue boxes) to provide two separate estimations of the yield. Using each type of side product, the yields of the designed pathway and alternative pathway were estimated as  $p_1 = m_1/n$  and  $p_2 = m_2/n$ , respectively, where  $m_1$  is the total number of products,  $m_2$  is the total number of side products, and  $n$  is the total number of reactants, products, and side products. Ambiguous and spurious structures were not counted. The standard error was calculated as  $p_i\sqrt{1-p_i}/\sqrt{n}$ , treating the yield as a Bernoulli probability.

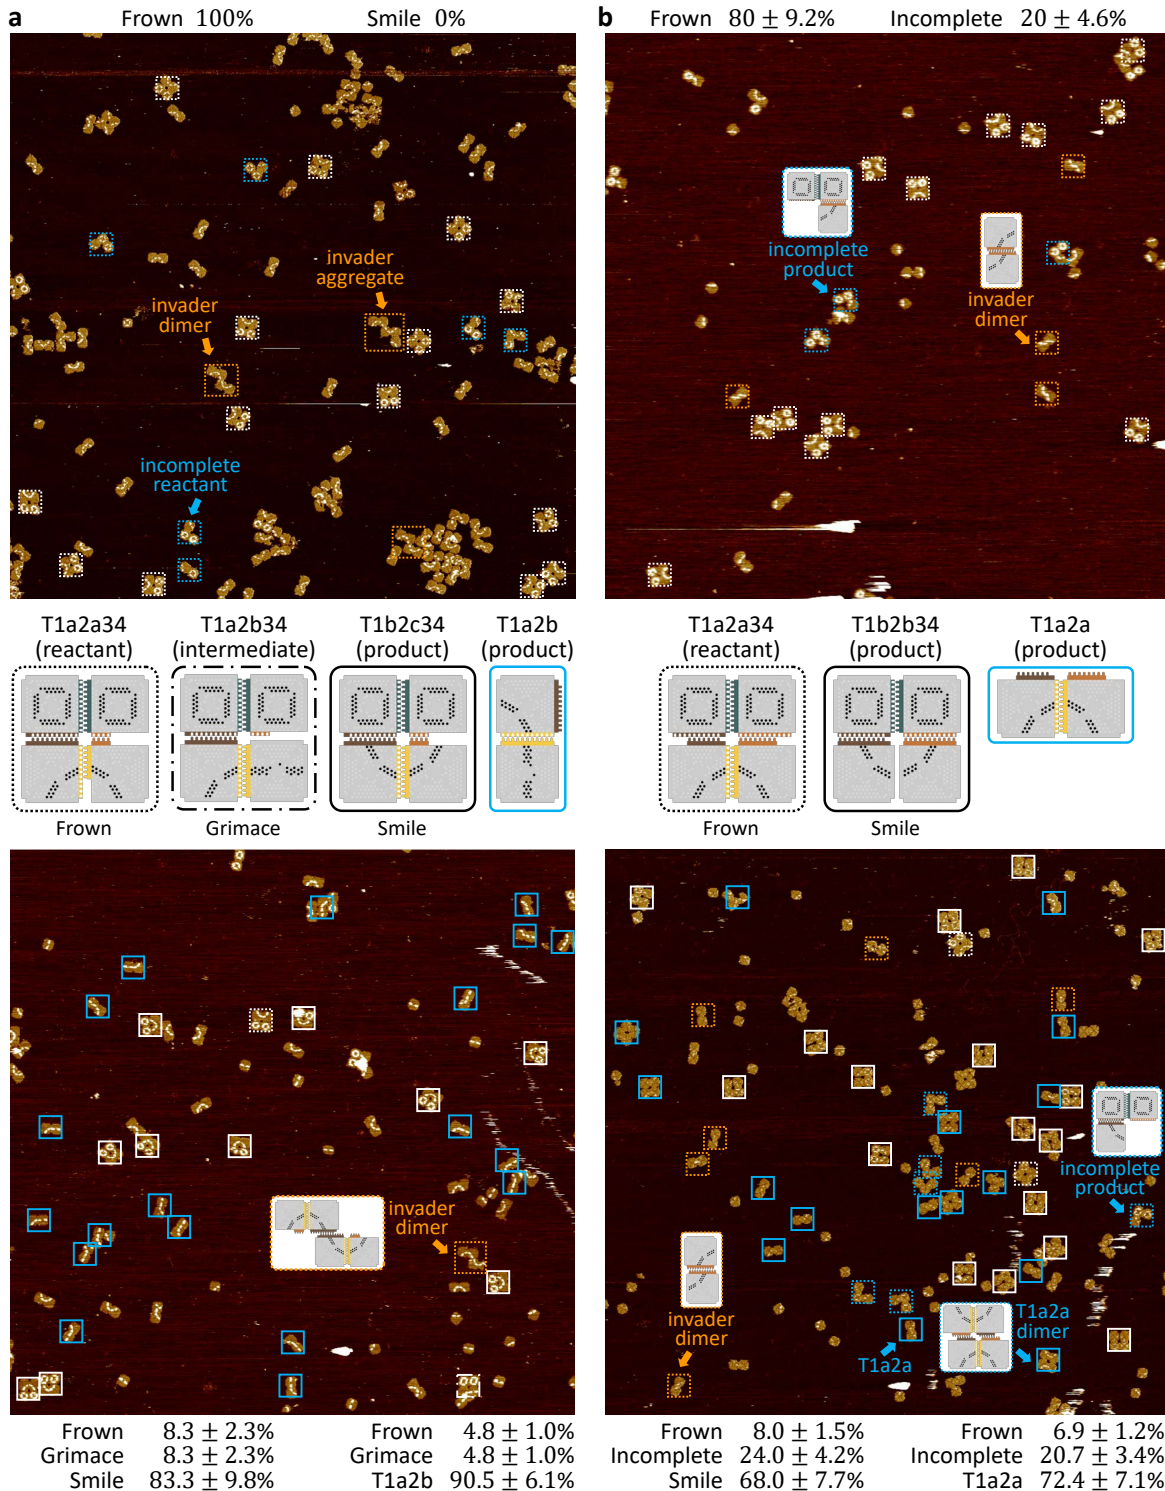

**Supplementary Figure 5 | Yield estimation of sequential and cooperative tile displacement.** (a) Sequential reaction in which 2 by 2 arrays were mixed together with the second invader without (top) and with (bottom) the first invader. (b) Cooperative reaction in which 2 by 2 arrays were mixed together with one (top) and both (bottom) invaders. All AFM images are 5 by 5  $\mu\text{m}$ . Each 2 by 2 array is highlighted as either a reactant (dotted boxes) or a product (solid boxes). Incomplete reactants and products are highlighted in dotted blue boxes. In the bottom two images, the two-tile-complex products are also highlighted (solid blue boxes) to provide a second estimation of the yield. Invaders and products with active edges can form spurious dimers or even larger aggregates — a few examples of these spurious structures are highlighted with diagrams for interpreting the structures. The yield of each tile displacement reaction was estimated as  $p_i = m_i/n_i$ , where  $m_i$  is the total number of products ( $i = 1$  for 2 by 2 arrays and  $i = 2$  for two-tile complexes), and  $n_i$  is the total number of reactants, products, and incomplete products counted in each image. Ambiguous structures were not counted. The standard error was calculated as  $p_i\sqrt{1-p_i}/\sqrt{n_i}$ , treating the yield as a Bernoulli probability.



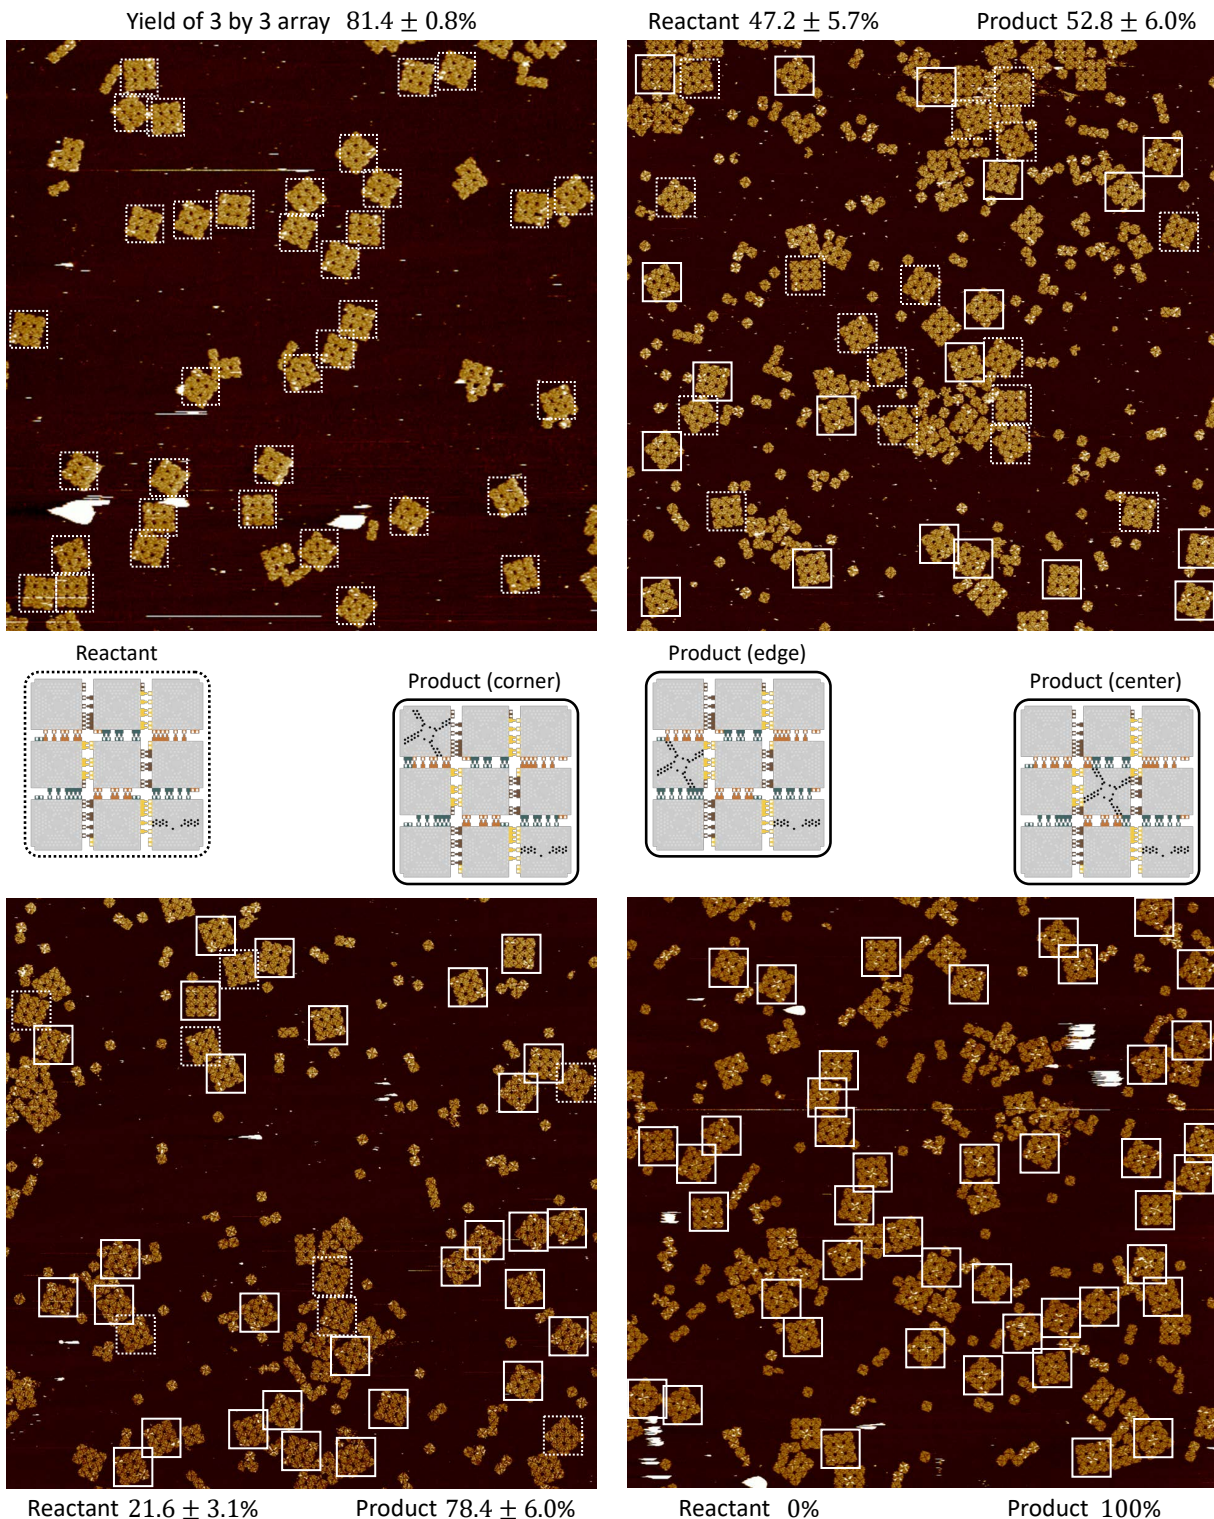

**Supplementary Figure 6 | Yield estimation of three types of tile displacement reactions in 3 by 3 arrays.** All AFM images are  $5$  by  $5$   $\mu\text{m}$ . Each 3 by 3 array is highlighted as either a reactant (dotted boxes) or a product (solid boxes). Yield of the initial 3 by 3 arrays before tile displacement was estimated as the number of tiles in complete structures over the total number of tiles (top left). Yields of corner (bottom left), edge (top right), and center (bottom right) tile displacement reactions were each estimated as  $p = m/n$ , where  $m$  is the total number of products and  $n$  is the total number of reactants and products counted in each image. Ambiguous and spurious structures were not counted. The standard error was calculated as  $p\sqrt{1-p}/\sqrt{n}$ , treating the yield as a Bernoulli probability.

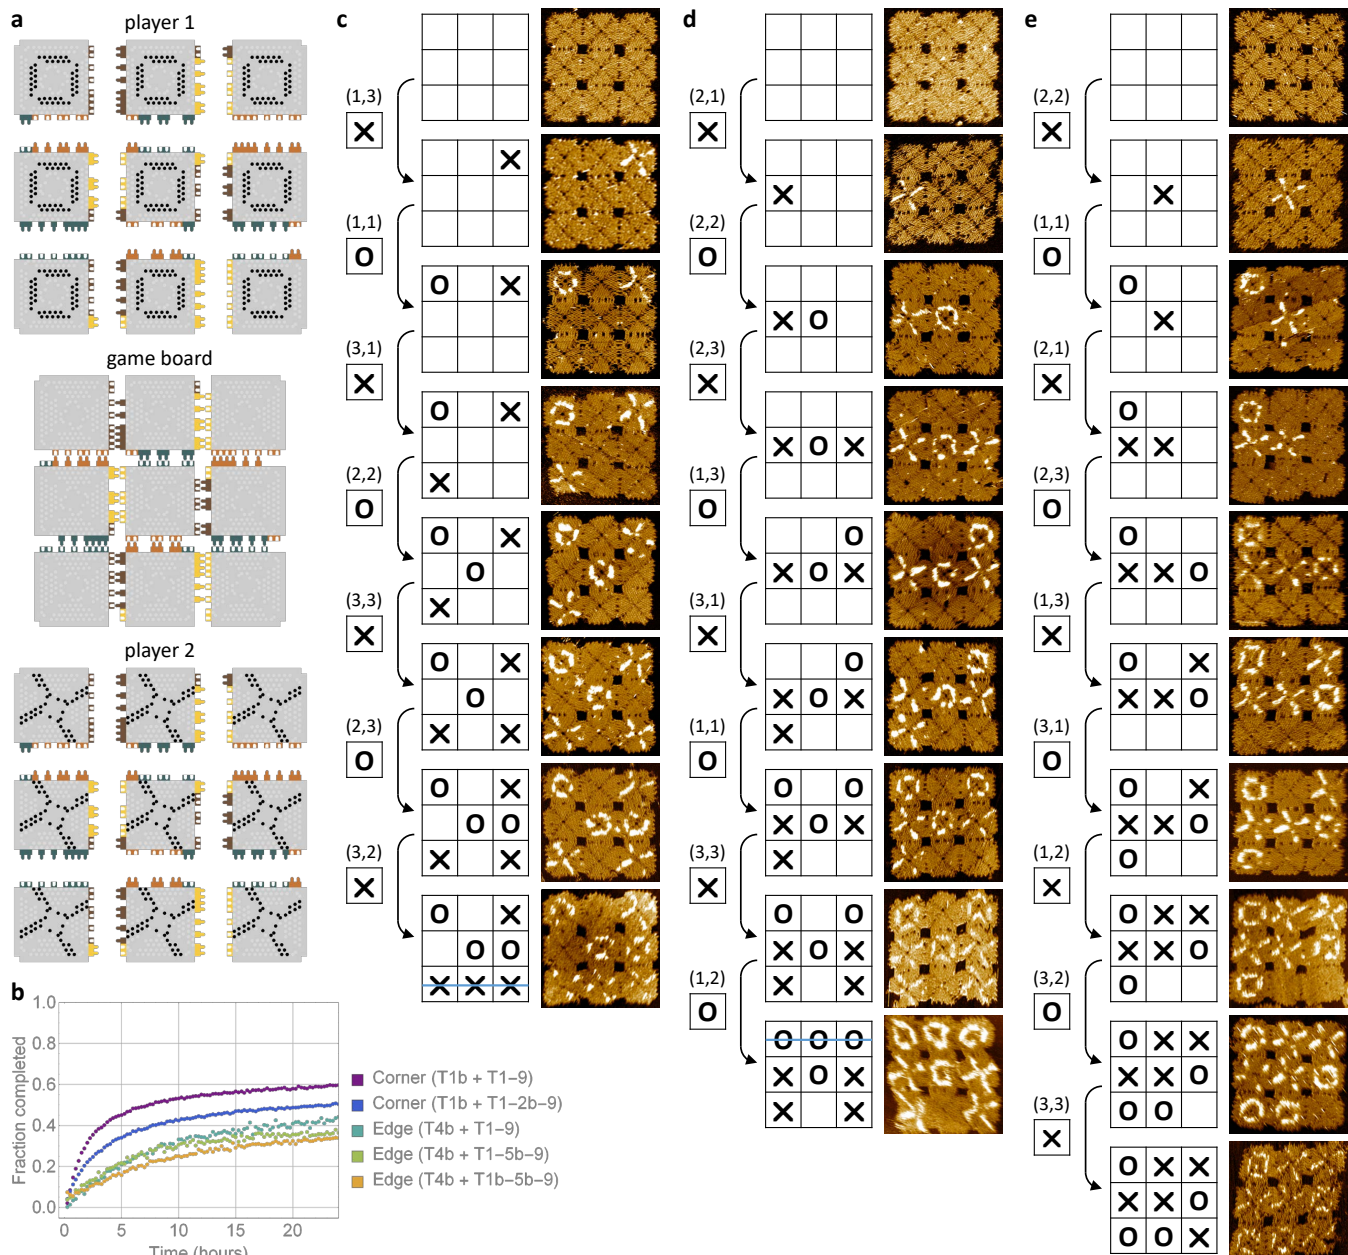

**Supplementary Figure 7 | Tic-tac-toe.** (a) Design. Two players each has 9 tiles labeled with X or O, each of which is designed to make a move by displacing one specific tile from the 3 by 3 array. All moves can be made in an arbitrary order. All toeholds are composed of 2 staples that each has a stacking bond and a 5-nt sticky end. The toeholds are of three types: near the 3' end of a tile edge and extended from the 5' end of the staples, near the 5' end of a tile edge and extended from the 5' or 3' end of the staples. All branch migration domains are composed of 6 staples that each has a stacking bond and a 2-nt sticky end, always extended from the 5' end of the staples. The branch migration domains are of three types with three unique edge codes: `--2.2.2222`, `22.22.2.2--`, and `--22.22--22` ('-' indicates a scaffold loop and '2' indicates a 2-nt staple). Because M13 scaffold naturally has different sequences near the four edges of the square tile, three types of toeholds and three edge codes readily provide 12 unique toeholds and 12 unique branch migration domains. (b) Fluorescence kinetics experiments of corner and edge tile displacement reactions with different starting conditions. The tile names correspond to those shown in Fig. 4a. (c) Game 1. After 7 moves, X won (same as shown in Fig. 4c). (d) Game 2. After 8 moves, O won. (e) Game 3. After 9 moves, the two players tied. (x, y) indicates the position of the tile to be displaced is in row x and column y. Experiments were performed at 25 °C and AFM images were collected after 24 hours of each move. All AFM images are 285 by 285 nm.



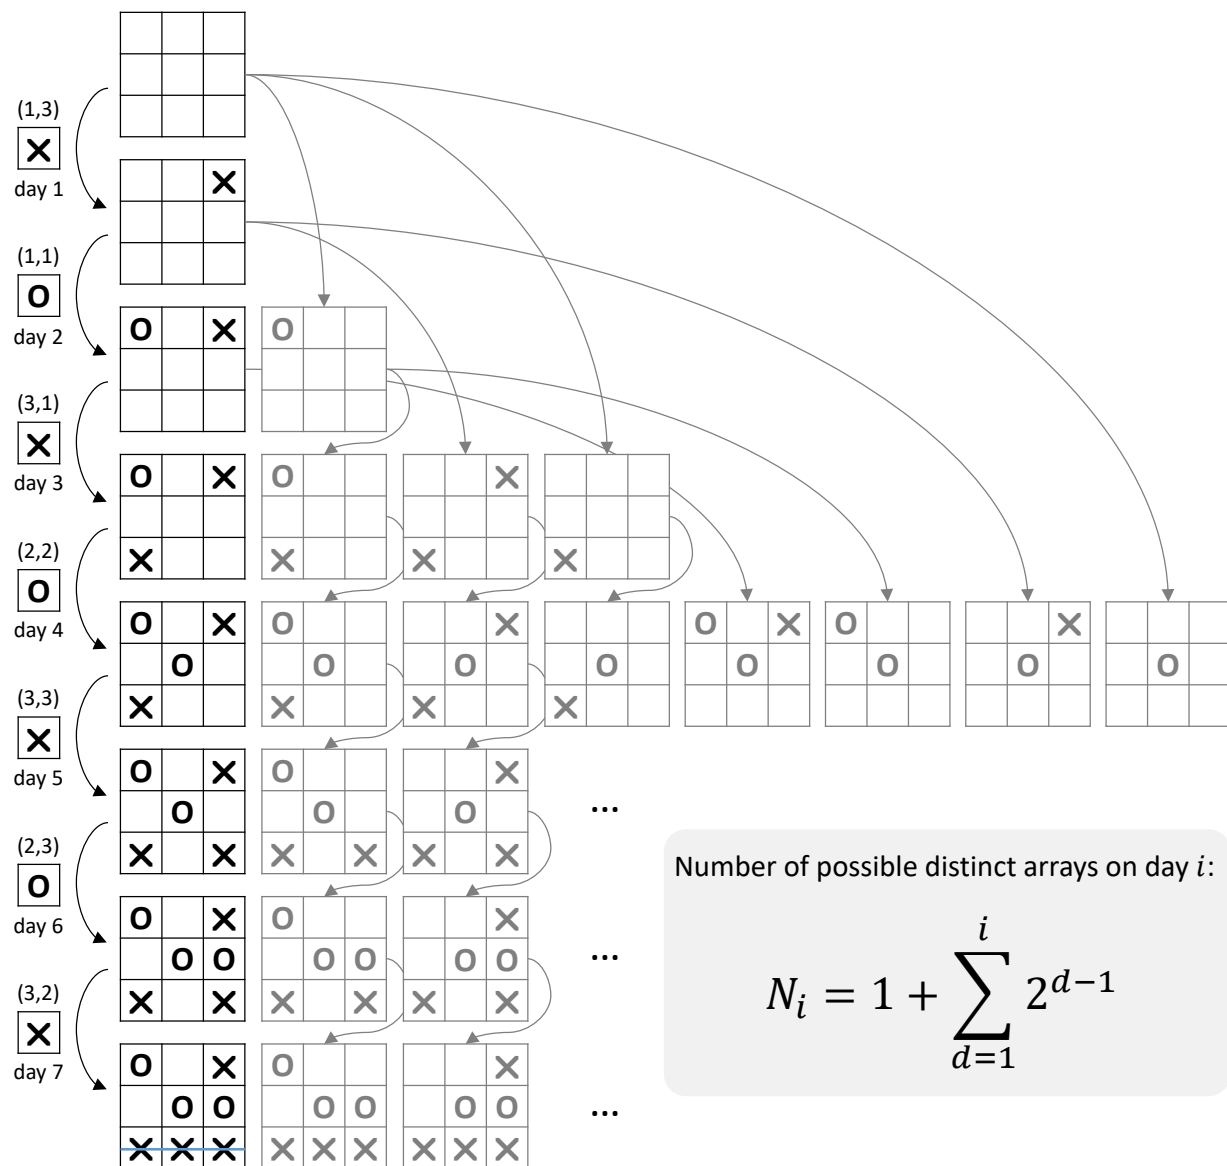

**Supplementary Figure 8 | Possible distinct arrays in Game 1.** On each day, when a new tile is added, it could either react with a correctly reconfigured array that has incorporated all target moves (black arrows) or react with any other array that only incorporated some of the target moves (gray arrows). Because of this, the total number of possible distinct arrays increases quickly with the number of moves played.

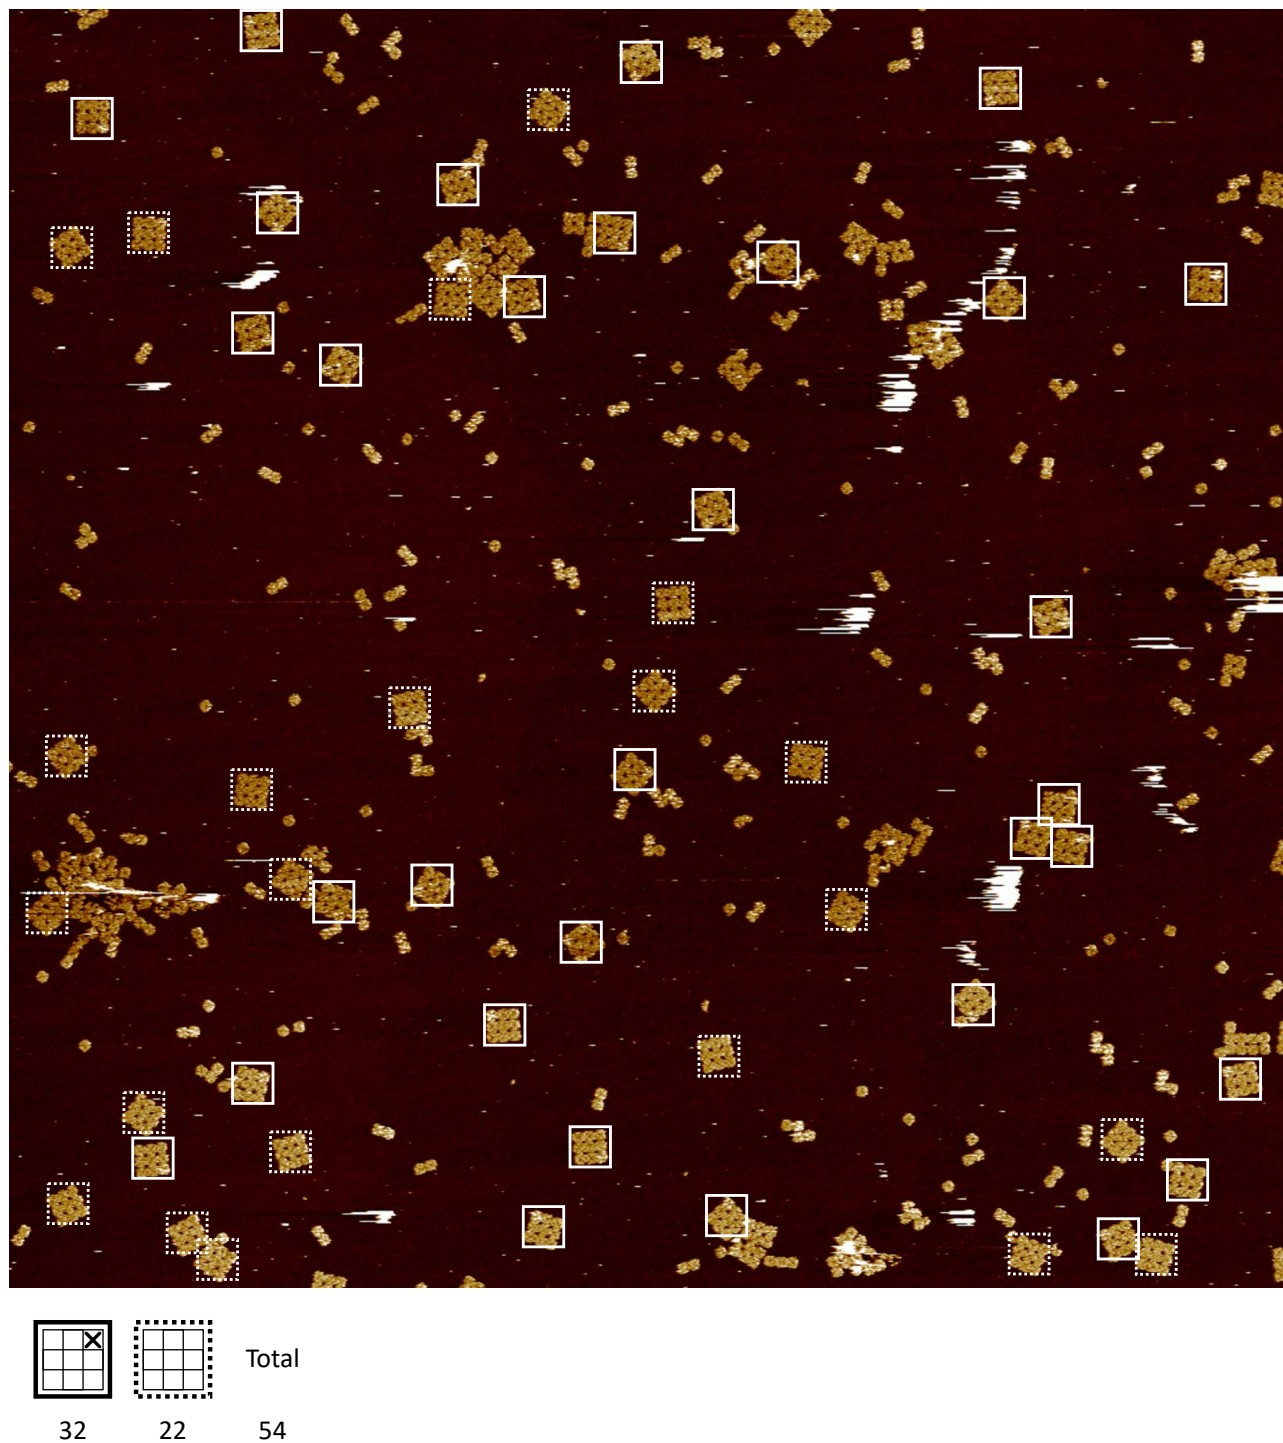

**Supplementary Figure 9 | Analysis of distinct arrays in day 1 of Game 1.** The AFM image is 10 by 10  $\mu\text{m}$ . Each 3 by 3 array is highlighted as either a product (solid boxes) or a reactant (dotted boxes). Yield of the tile displacement reaction was estimated as  $p = m/n = 59.3\%$ , where  $m = 32$  is the total number of products and  $n = 54$  is the total number of products and reactants. Ambiguous and spurious structures were not counted. The standard error was calculated as  $p\sqrt{1-p}/\sqrt{n} = 5.1\%$ , treating the yield as a Bernoulli probability.



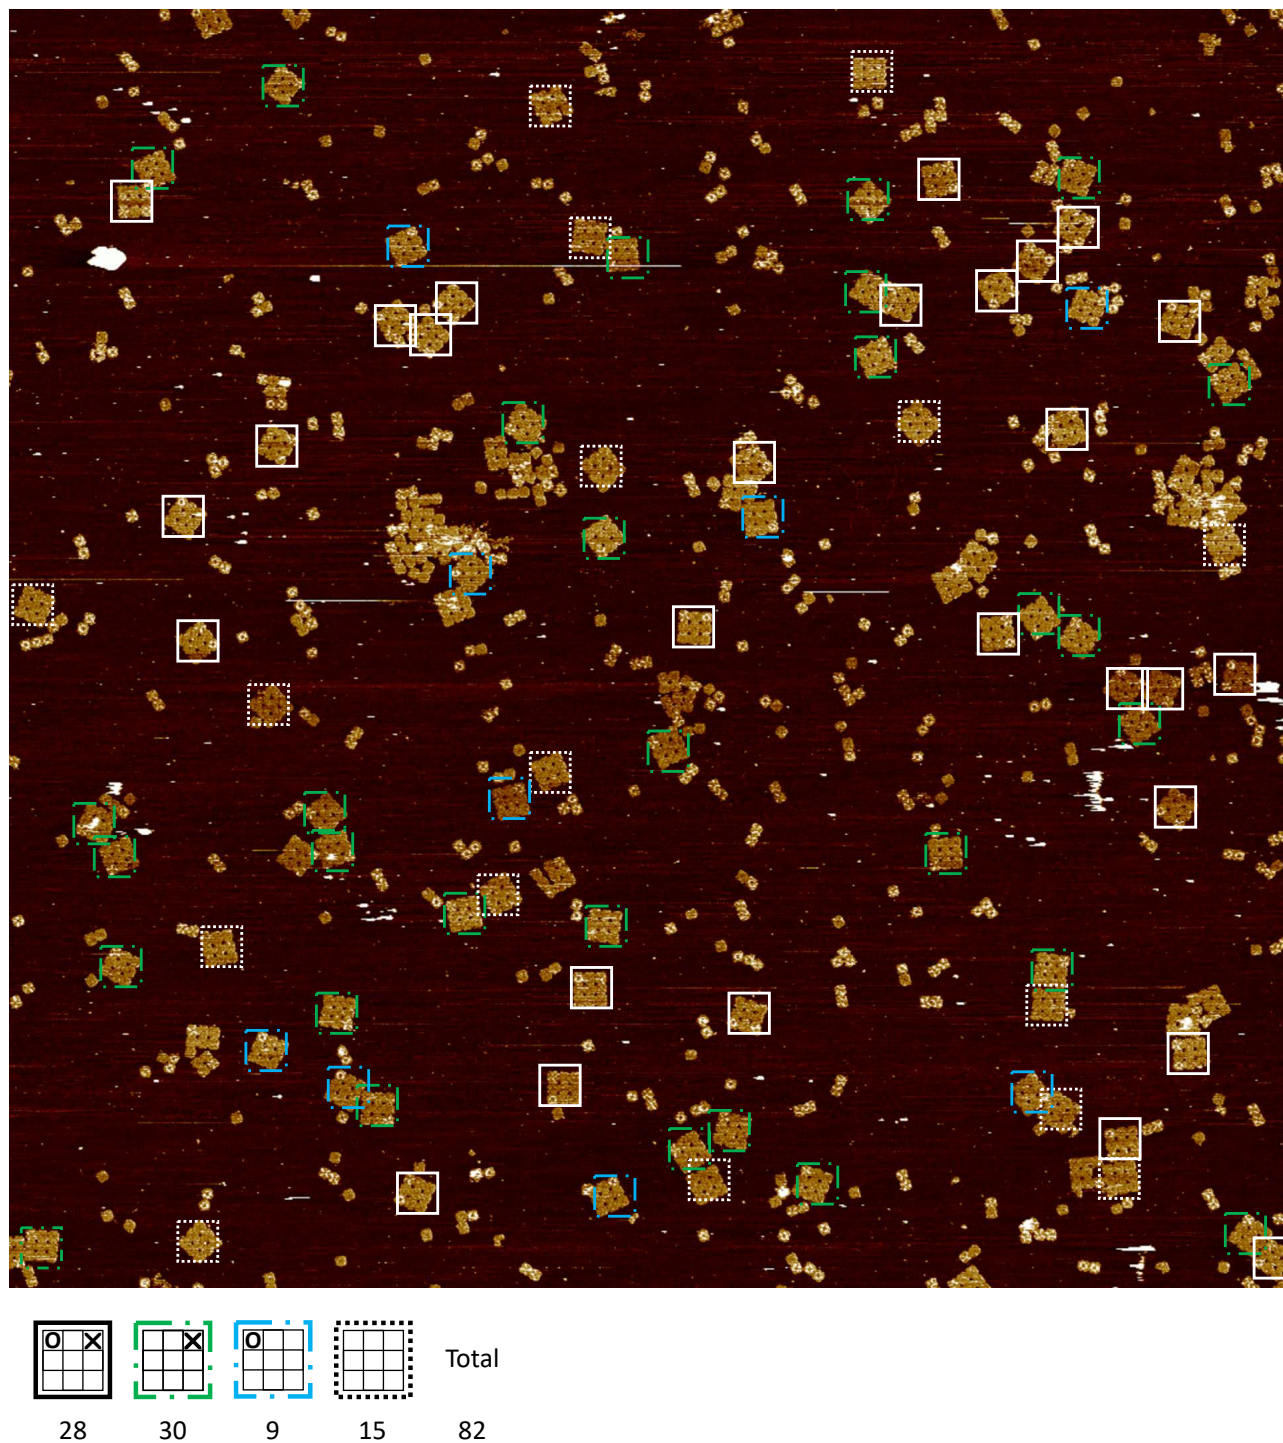

**Supplementary Figure 10 | Analysis of distinct arrays in day 2 of Game 1.** The AFM image is 10 by 10  $\mu\text{m}$ . Each 3 by 3 array is highlighted as either a product incorporating all target moves (solid boxes), or an incomplete product incorporating only some of the moves (dashed boxes), or a reactant (dotted boxes). Yield of the tile displacement cascade was estimated as  $p = m/n = 34.1\%$ , where  $m = 28$  is the total number of products and  $n = 82$  is the total number of products, incomplete products, and reactants. Ambiguous and spurious structures were not counted. The standard error was calculated as  $p\sqrt{1-p}/\sqrt{n} = 3.1\%$ , treating the yield as a Bernoulli probability.



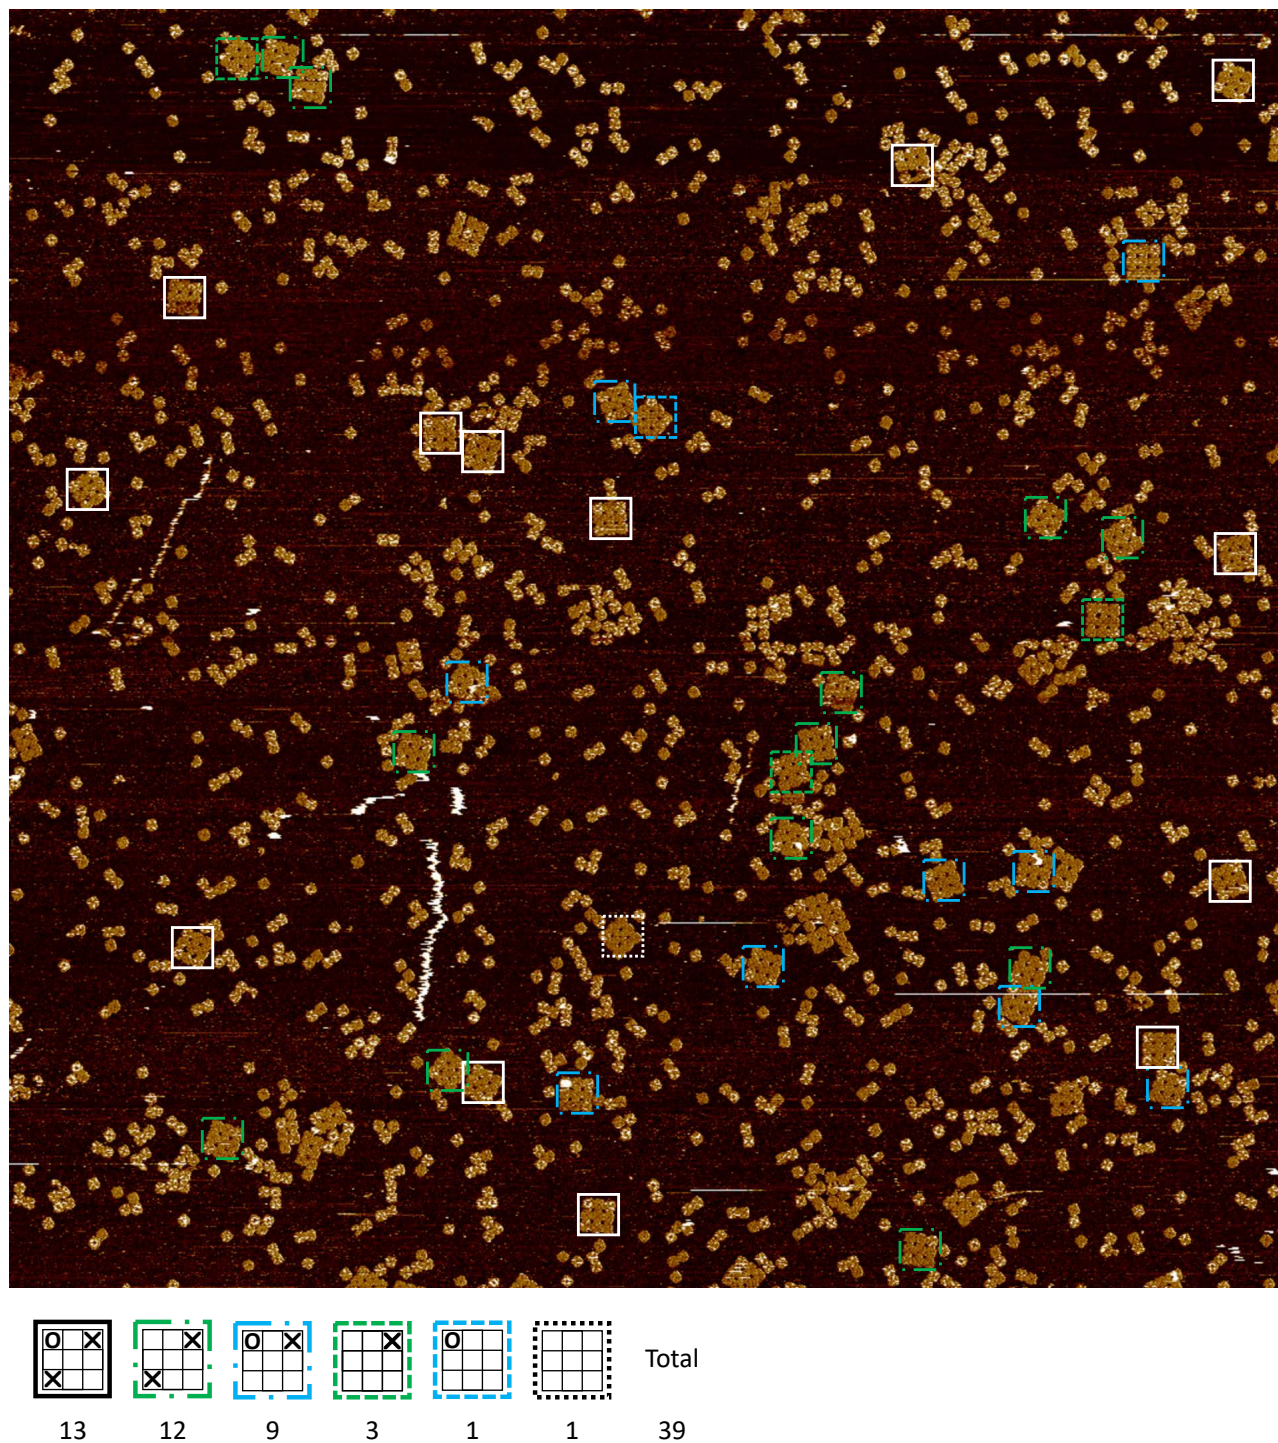

**Supplementary Figure 11 | Analysis of distinct arrays in day 3 of Game 1.** The AFM image is 10 by 10  $\mu\text{m}$ . Each 3 by 3 array is highlighted as either a product incorporating all target moves (solid boxes), or an incomplete product incorporating only some of the moves (dashed boxes), or a reactant (dotted boxes). Yield of the tile displacement cascade was estimated as  $p = m/n = 33.3\%$ , where  $m = 13$  is the total number of products and  $n = 39$  is the total number of products, incomplete products, and reactants. Ambiguous and spurious structures were not counted. The standard error was calculated as  $p\sqrt{1-p}/\sqrt{n} = 4.4\%$ , treating the yield as a Bernoulli probability.



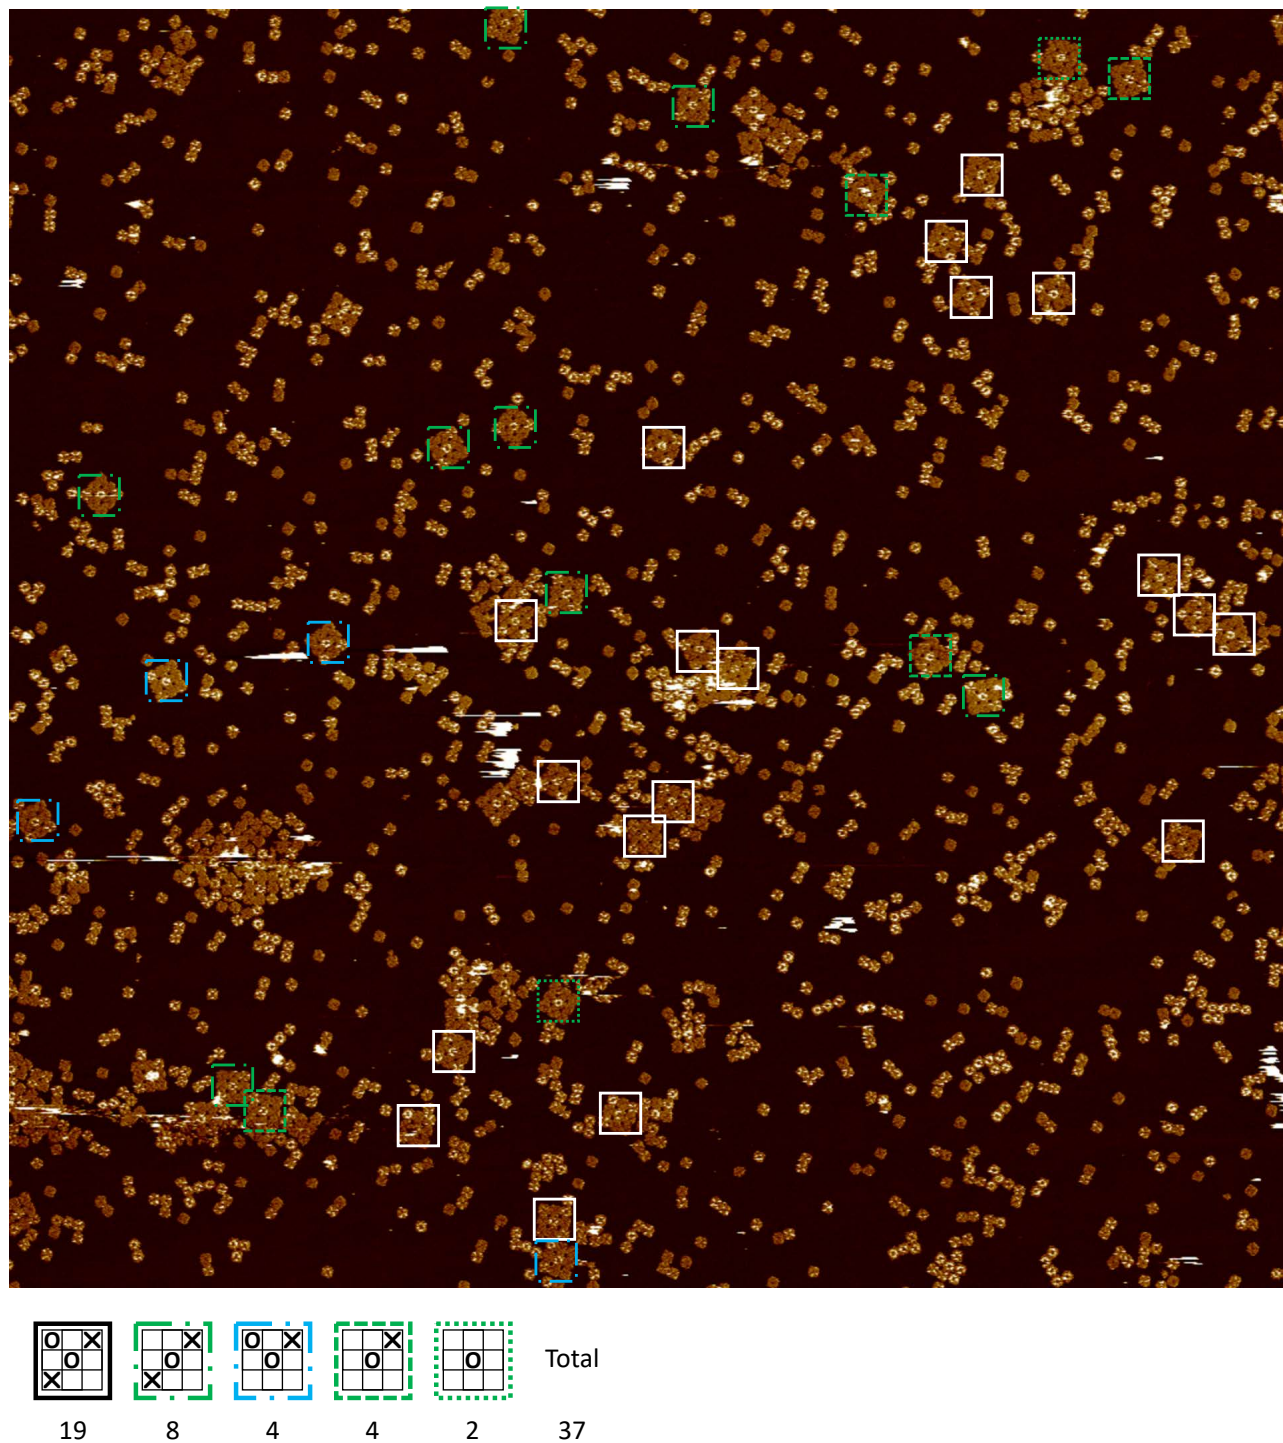

**Supplementary Figure 12 | Analysis of distinct arrays in day 4 of Game 1.** The AFM image is 10 by 10  $\mu\text{m}$ . Each 3 by 3 array is highlighted as either a product incorporating all target moves (solid boxes) or an incomplete product incorporating only some of the moves (dashed and dotted boxes). No reactants (i.e. plain 3 by 3 arrays) were found in this image. Yield of the tile displacement cascade was estimated as  $p = m/n = 51.4\%$ , where  $m = 19$  is the total number of products and  $n = 37$  is the total number of products and incomplete products. Ambiguous and spurious structures were not counted. The standard error was calculated as  $p\sqrt{1-p}/\sqrt{n} = 5.9\%$ , treating the yield as a Bernoulli probability.



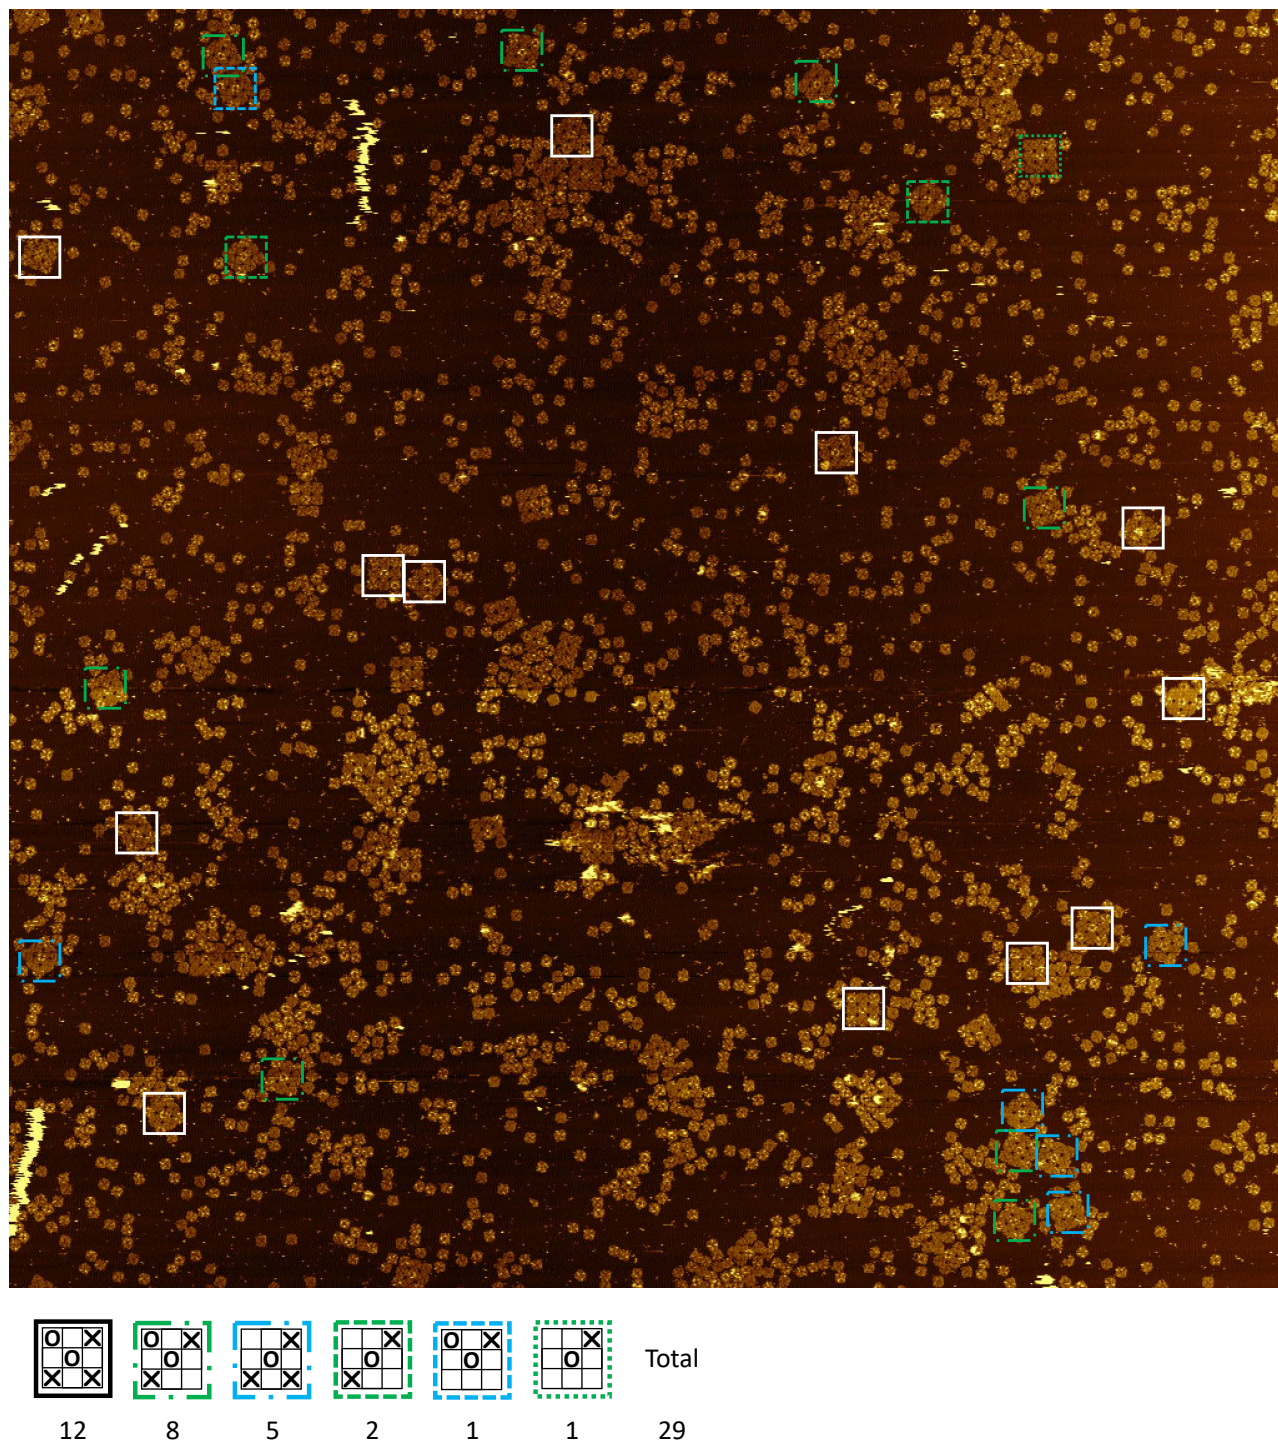

**Supplementary Figure 13 | Analysis of distinct arrays in day 5 of Game 1.** The AFM image is 10 by 10  $\mu\text{m}$ . Each 3 by 3 array is highlighted as either a product incorporating all target moves (solid boxes) or an incomplete product incorporating only some of the moves (dashed and dotted boxes). No reactants (i.e. plain 3 by 3 arrays) were found in this image. Yield of the tile displacement cascade was estimated as  $p = m/n = 41.4\%$ , where  $m = 12$  is the total number of products and  $n = 29$  is the total number of products and incomplete products. Ambiguous and spurious structures were not counted. The standard error was calculated as  $p\sqrt{1-p}/\sqrt{n} = 5.9\%$ , treating the yield as a Bernoulli probability.



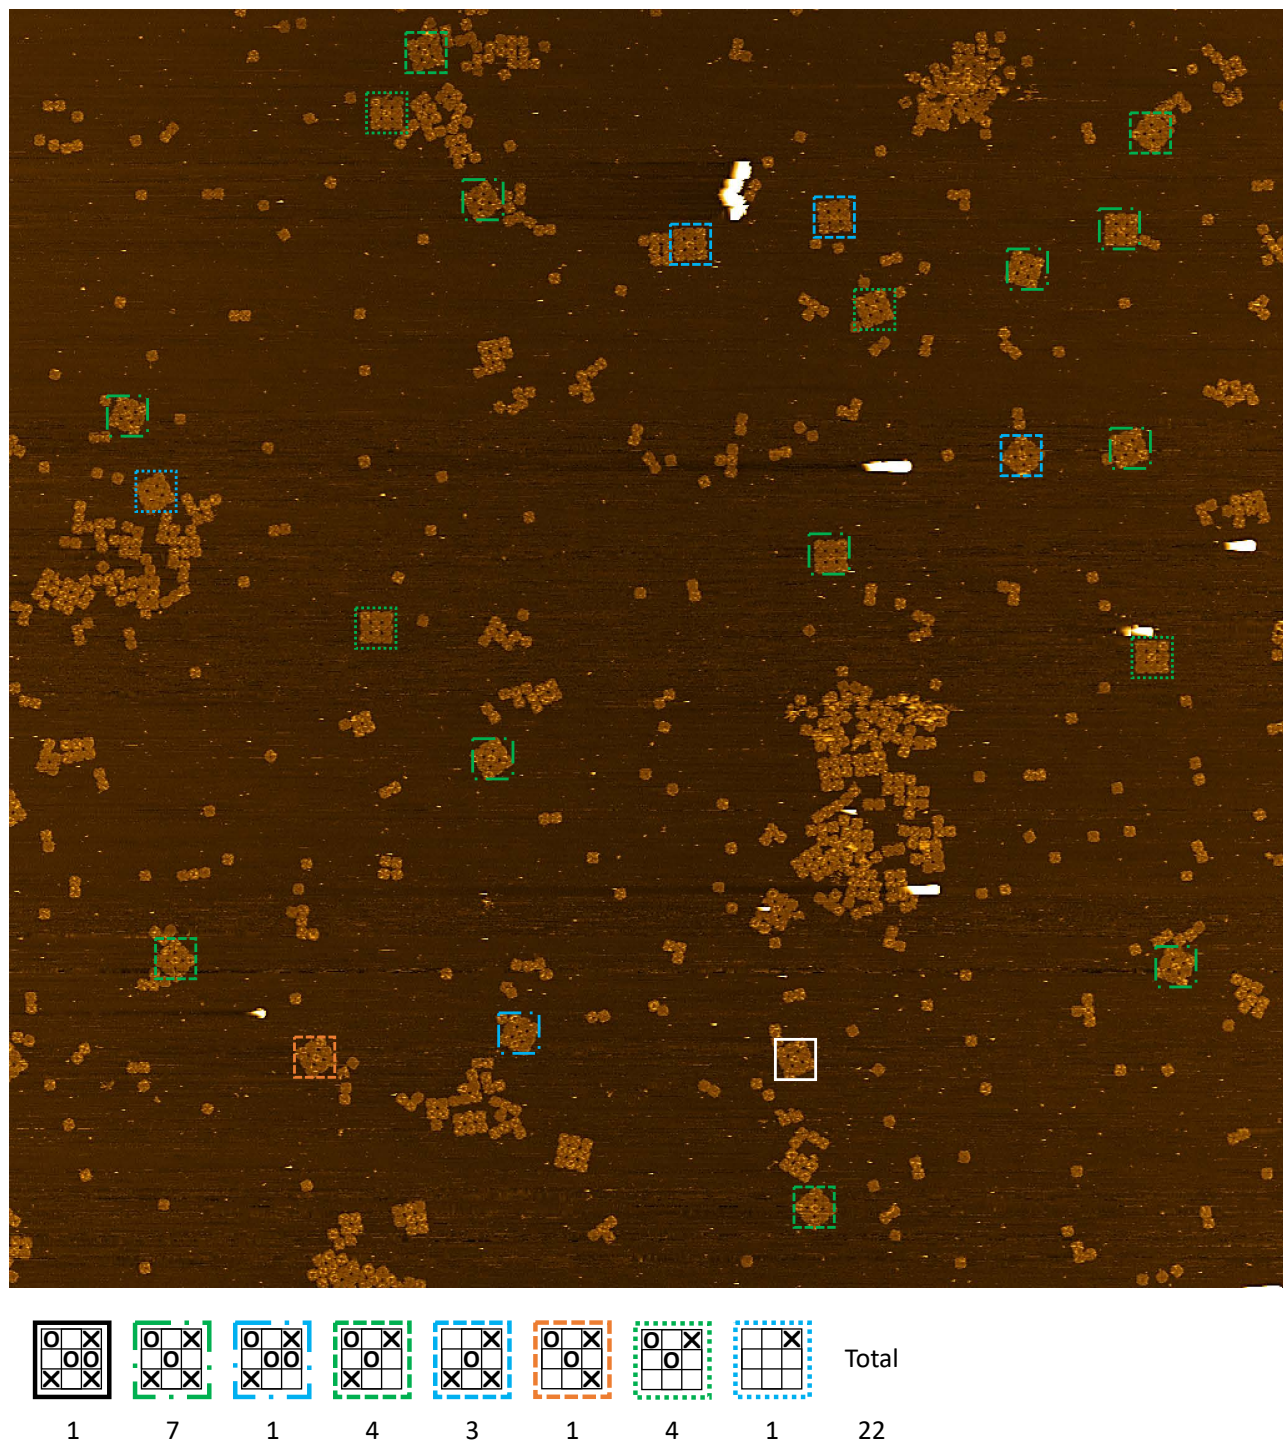

**Supplementary Figure 14 | Analysis of distinct arrays in day 6 of Game 1.** The AFM image is 10 by 10  $\mu\text{m}$ . Each 3 by 3 array is highlighted as either a product incorporating all target moves (solid boxes) or an incomplete product incorporating only some of the moves (dashed and dotted boxes). No reactants (i.e. plain 3 by 3 arrays) were found in this image. Yield of the tile displacement cascade was estimated as  $p = m/n = 4.5\%$ , where  $m = 1$  is the total number of products and  $n = 22$  is the total number of products and incomplete products. Ambiguous and spurious structures were not counted. The standard error was calculated as  $p\sqrt{1-p}/\sqrt{n} = 0.9\%$ , treating the yield as a Bernoulli probability.



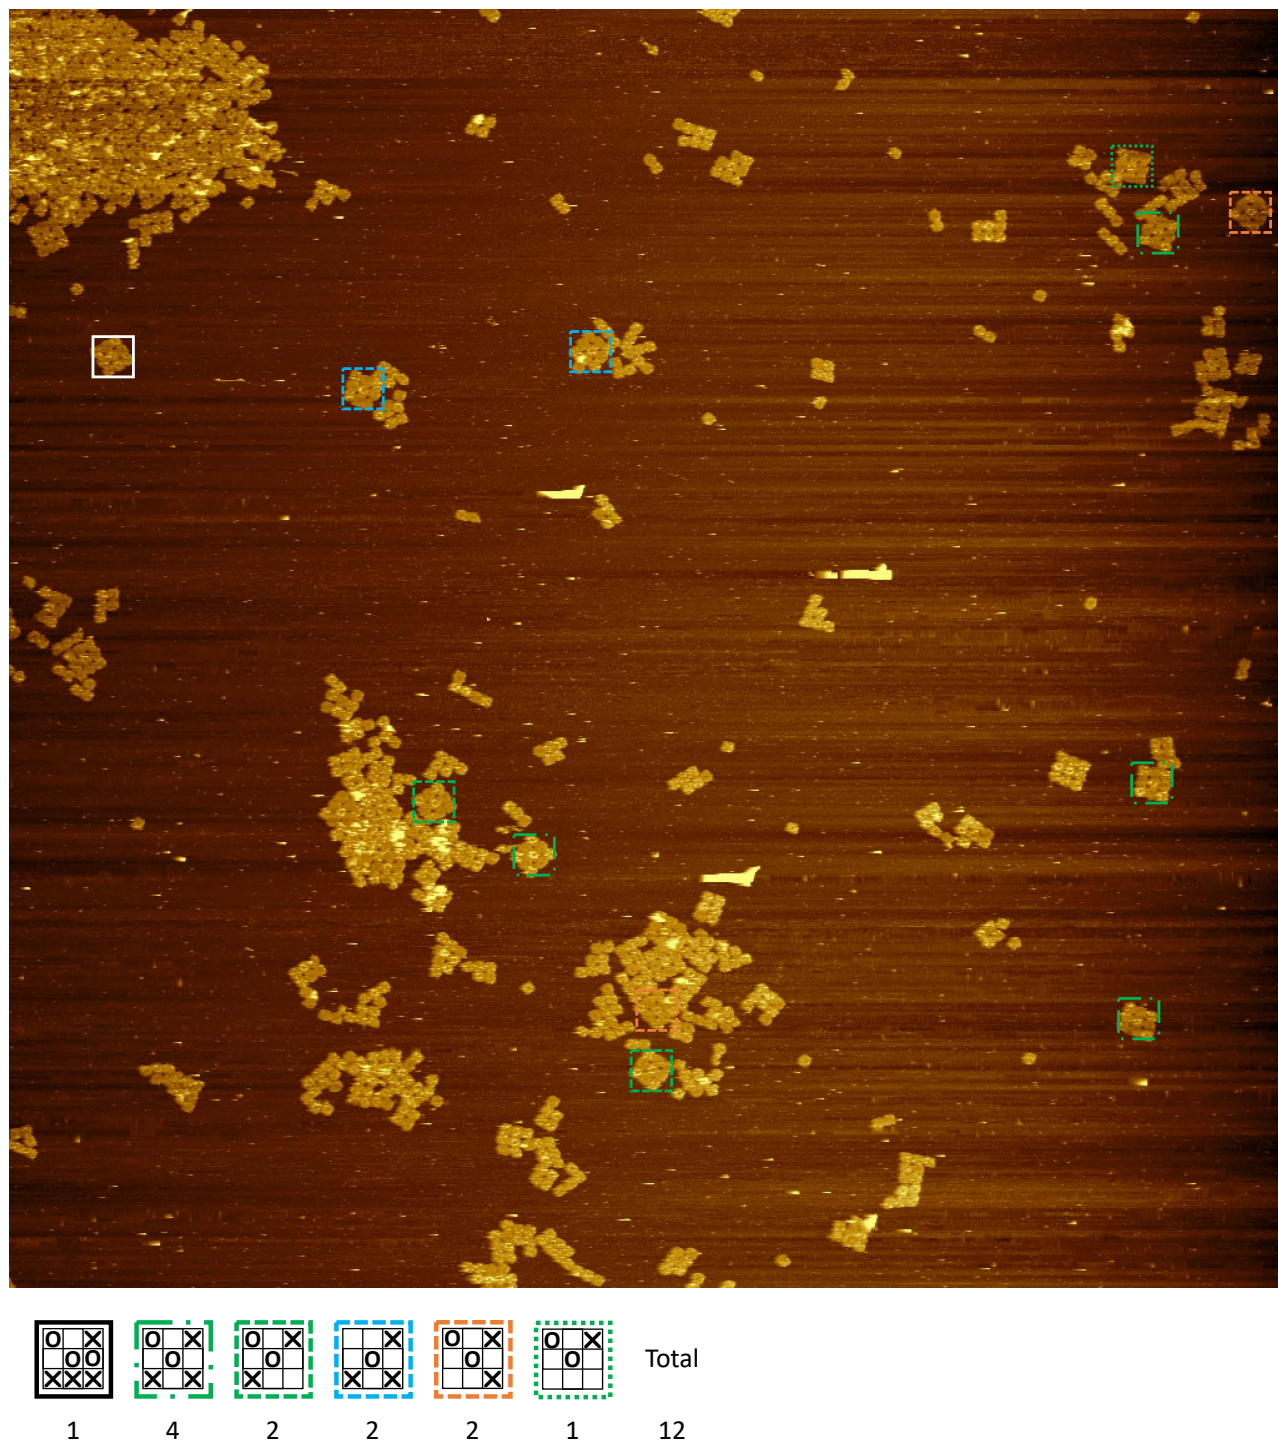

**Supplementary Figure 15 | Analysis of distinct arrays in day 7 of Game 1.** The AFM image is 10 by 10  $\mu\text{m}$ . Each 3 by 3 array is highlighted as either a product incorporating all target moves (solid boxes) or an incomplete product incorporating only some of the moves (dashed and dotted boxes). No reactants (i.e. plain 3 by 3 arrays) were found in this image. Yield of the tile displacement cascade was estimated as  $p = m/n = 8.3\%$ , where  $m = 1$  is the total number of products and  $n = 12$  is the total number of products and incomplete products. Ambiguous and spurious structures were not counted. The standard error was calculated as  $p\sqrt{1-p}/\sqrt{n} = 2.3\%$ , treating the yield as a Bernoulli probability.



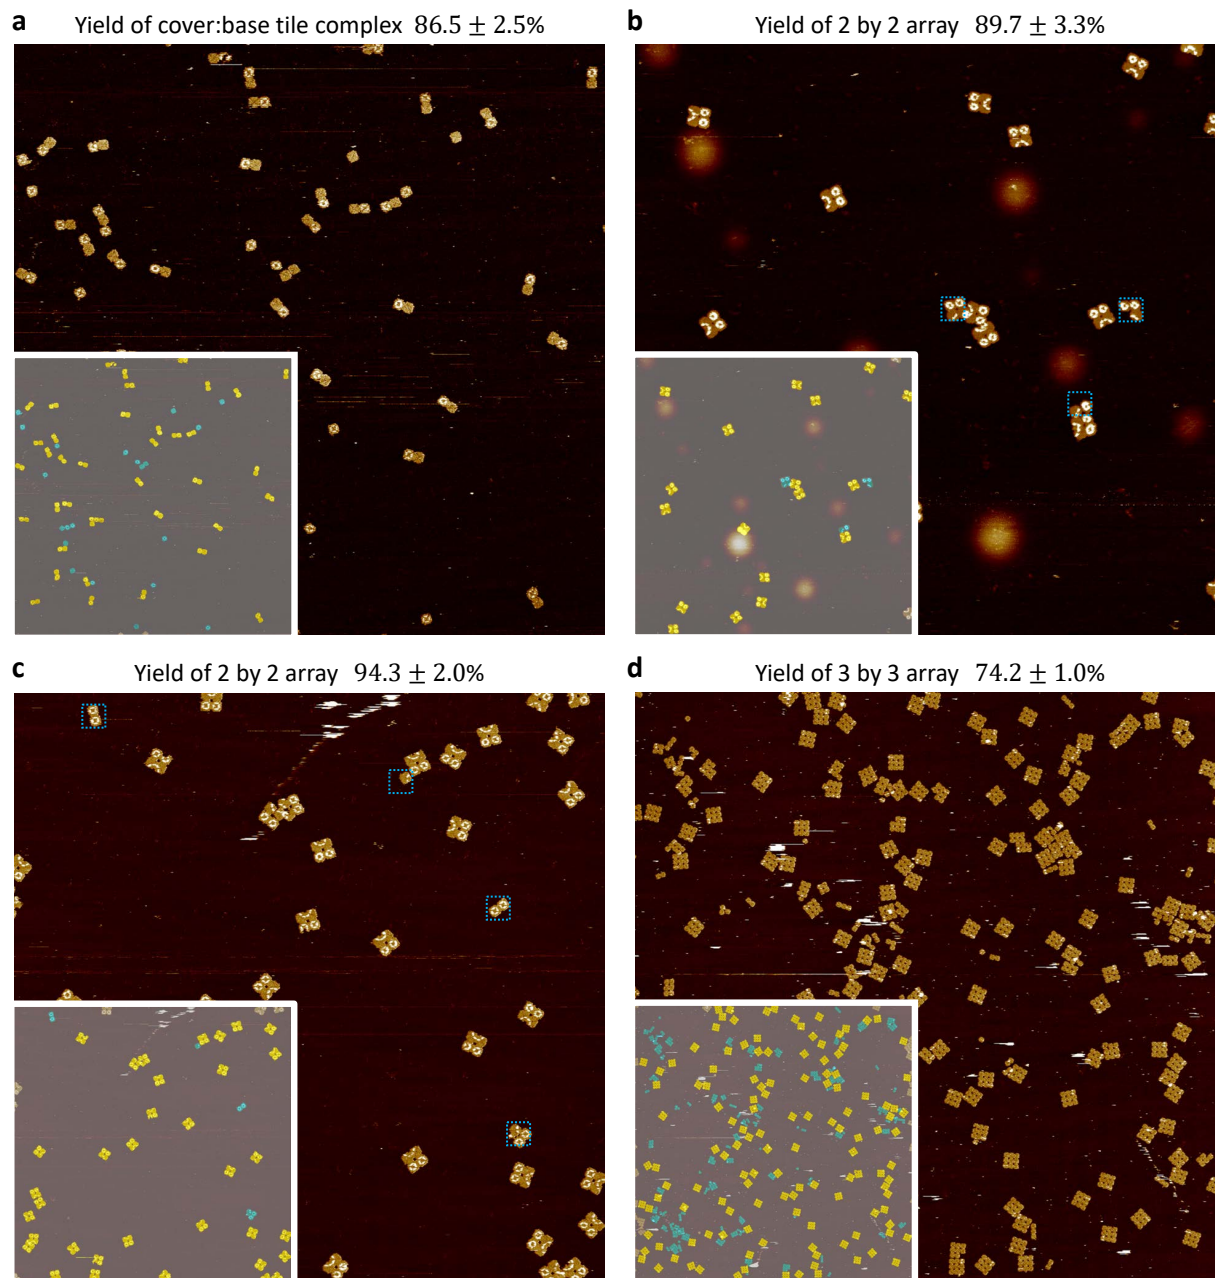

**Supplementary Figure 16 | Yield estimation of tile complexes and arrays before tile displacement.** (a) Cover:base tile complexes. Cover tile was in 20% excess. Therefore, the yield of the complexes was adjusted by  $\times 1.1$ . (b) 2 by 2 arrays that are the reactants in sequential reconfiguration. (c) 2 by 2 arrays that are the reactants in cooperative reconfiguration. (d) 3 by 3 arrays that are the reactants in the tic-tac-toe game. The bottom right AFM image is 10 by 10  $\mu\text{m}$  and the other three AFM images are 5 by 5  $\mu\text{m}$ . All yields were estimated as the number of pixels in target structures over the total number of pixels in all structures, using a Yield Calculator.<sup>3</sup> The standard error was calculated as  $p\sqrt{1-p}/\sqrt{n}$ , where  $p$  is the estimated yield and  $n$  is the total number of tiles, treating the yield as a Bernoulli probability. The structures highlighted in **b** and **c** helped identifying incomplete reactants in Supplementary Figure 5.

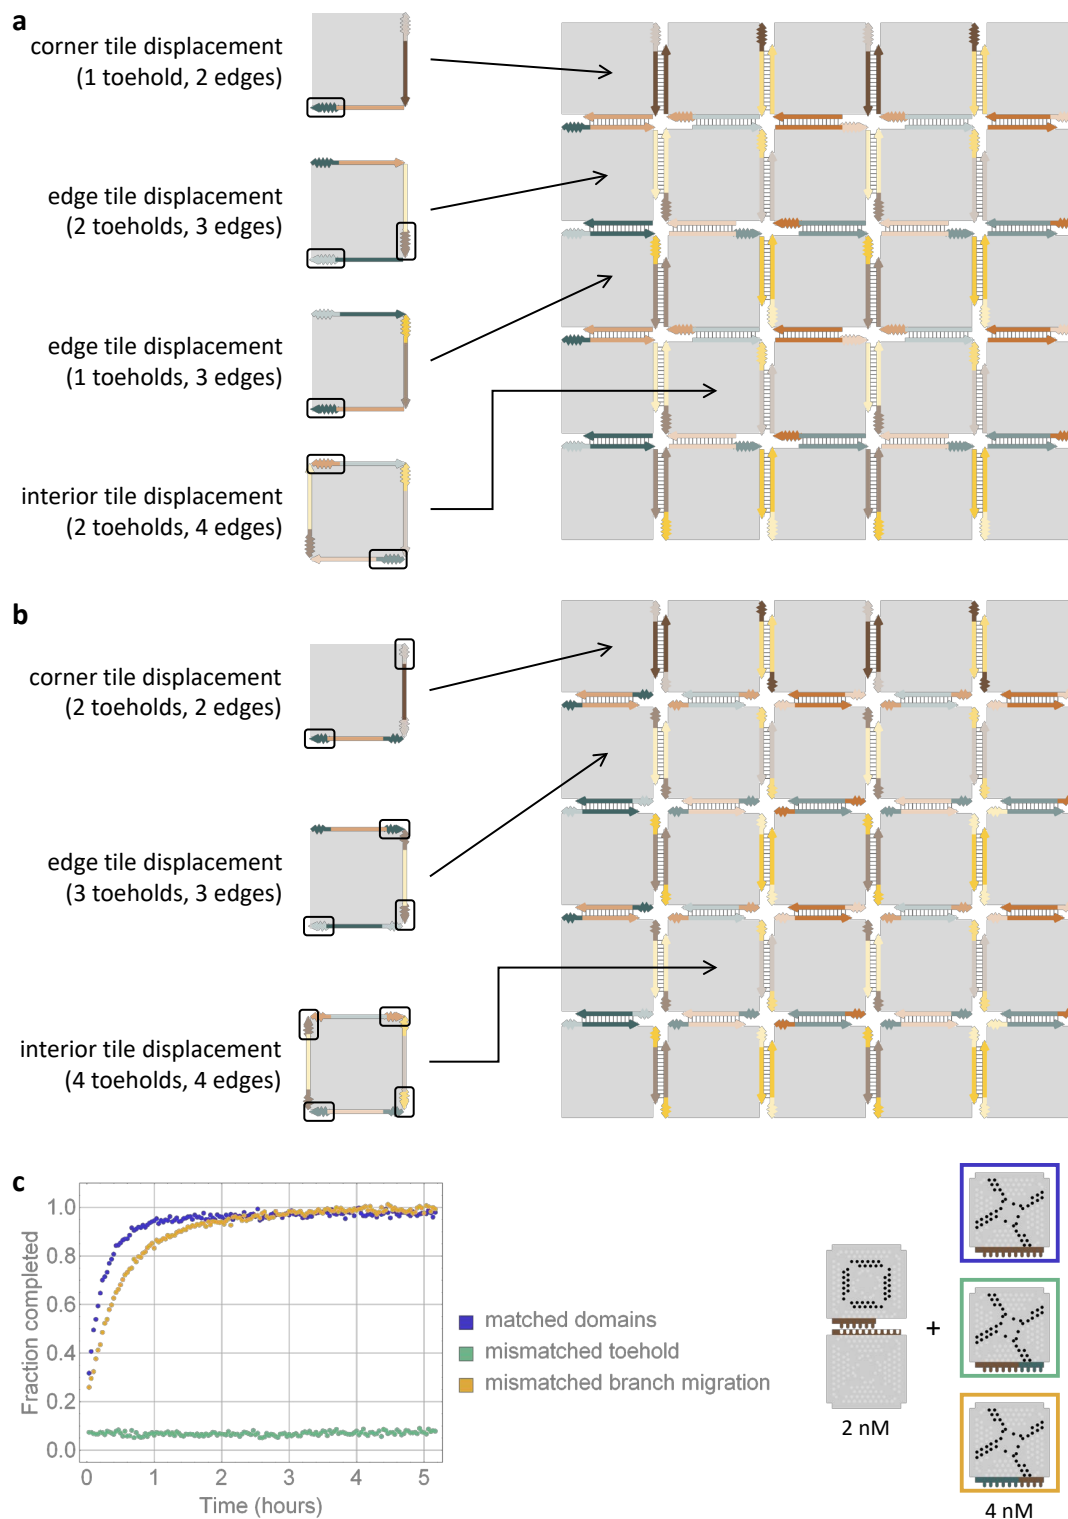

**Supplementary Figure 17 | Considerations for further generalization.** Design of tile displacement in a 5 by 5 array with one toehold (a) and two toeholds (b) along each edge. (c) Fluorescence kinetics experiments for mismatched toehold and branch migration domains. Note that these branch migration domains are continuous. For coded edges shown in Fig. 4b, even with up to 80% similarity in the sticky end sequences of the toehold staples, no incorrect tile integration was observed in AFM images (Supplementary Figure 6), indicating sufficient specificity in branch migration domains.

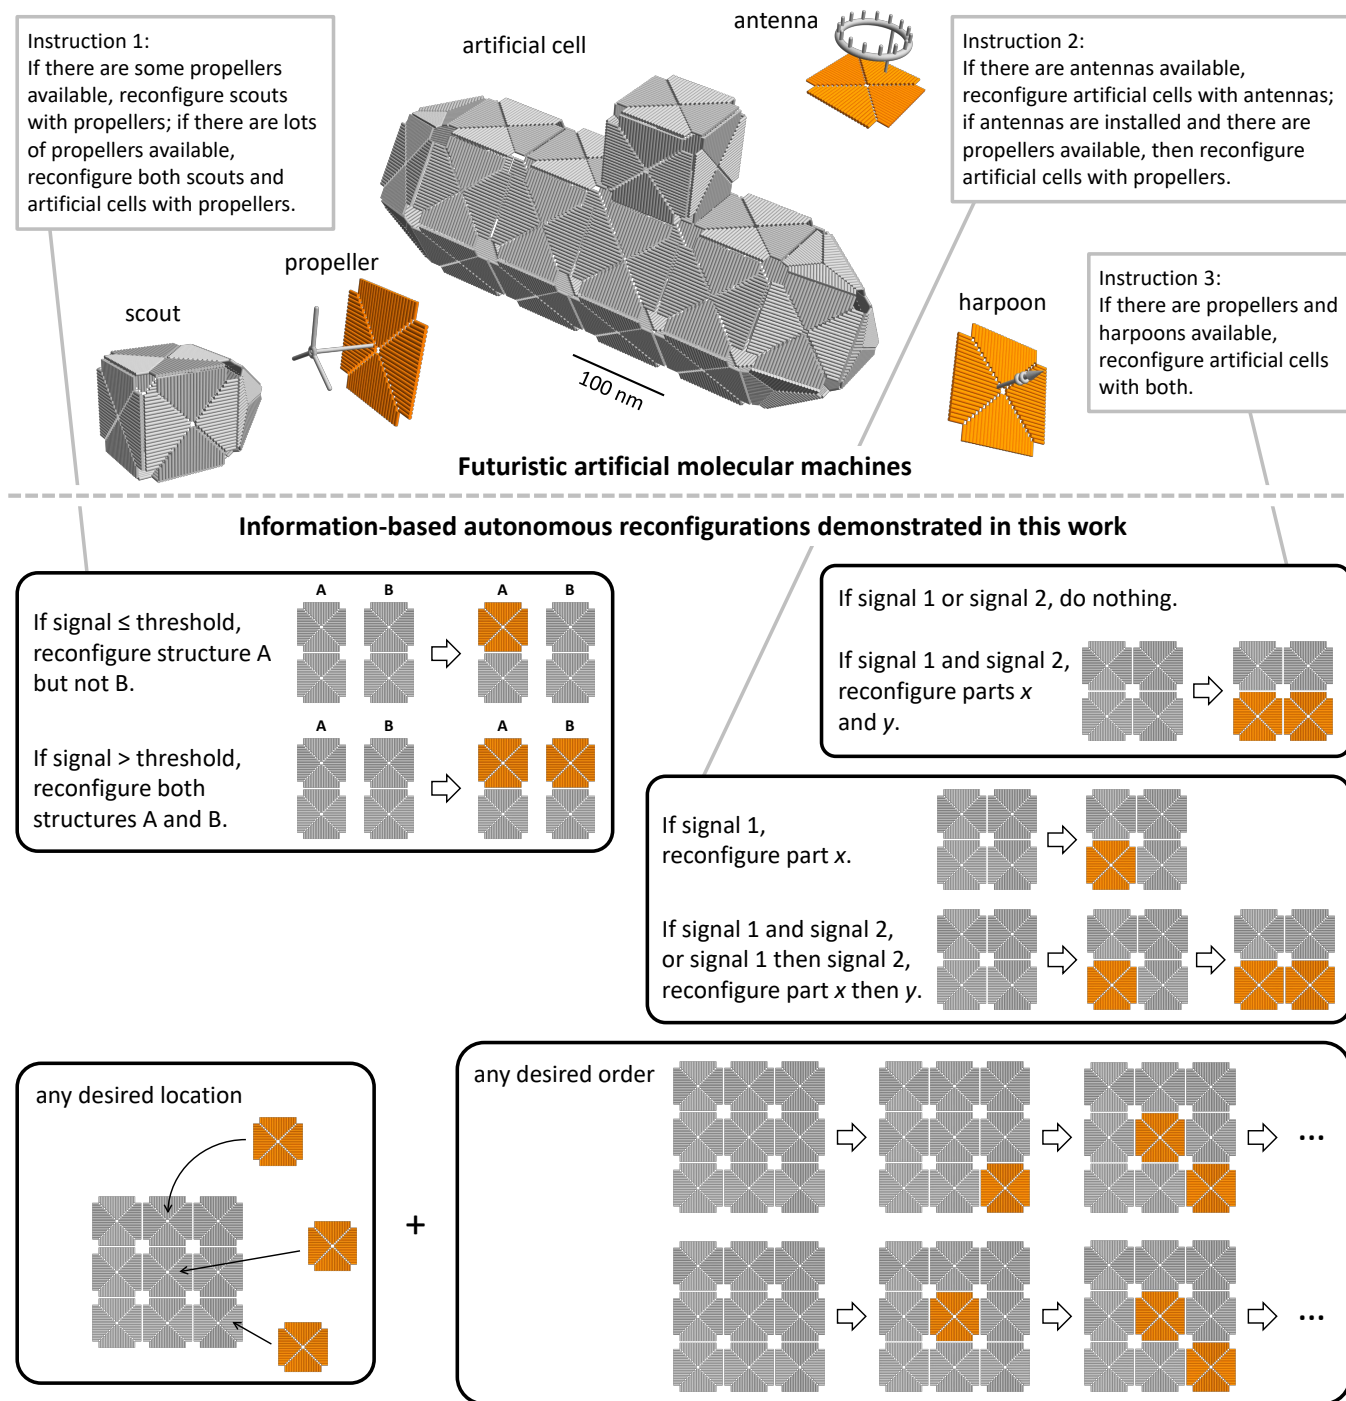

**Supplementary Figure 18 | A future of adaptive artificial molecular machines.** The artificial cell and scout indicate different species of molecular machines operating in the same environment. The antenna, propeller and harpoon indicate resources available at certain times or instructions sent from one molecular machine to another. Tile displacement allows pre-fabricated complex molecular components with specific spatial arrangements to be integrated into molecular machines at the right time during autonomous operations. Note that both square tiles and triangular tiles<sup>1</sup> shown in the artificial cell have been implemented with DNA origami tiles. The angle shown between tiles is not compatible with blunt-end stacking interactions but the tiles can bend along the seams between the isosceles triangles composing the squares and equilateral triangles to allow for desired interactions between adjacent tiles, for example as demonstrated in a 20-triangular-tile 3D structure interpreted as a rhombic triacontahedron.<sup>1</sup>

## Supplementary Notes

### Supplementary Note 1 | Modeling and simulations

Tile displacement reactions with varying toeholds shown in Fig. 1d were modeled as follows. Assume that an invader ( $\text{Inv}_{xy}$ ) binds to a cover:base tile complex ( $\text{CT:BT}_x$ ) at rate  $k_{\text{on}}$ . The toehold either dissociates at rate  $k_{\text{off}}$ , converting the invader back to a free tile, or initiates a branch migration at rate  $k_{\text{d}}$ , resulting in release of the cover tile (CT) and an invader:base tile complex ( $\text{Inv}_{xy}\text{:BT}_x$ ).  $x = 1$  or  $2$  indicates the number of nucleotides in the sticky end of each edge staple.  $y = 0$  through  $4$  indicates the number of edge staples in the toehold domain.

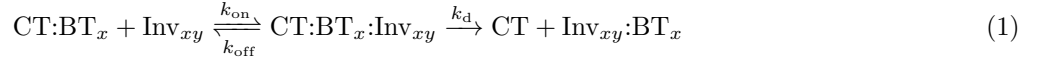

With this model, we simulated the reactions with mass-action kinetics by solving the differential equations involved in all reaction steps using a CRN Simulator Package.<sup>4</sup> Comparing the simulations with experimental data (Fig. 1f), including additional experiments with varying concentrations of the invader (Supplementary Figure 2b), we found a set of parameters that explained the data reasonably well.

$$\begin{aligned} k_{\text{on}} &= \begin{cases} 2.5 \times 10^4 \text{ M}^{-1}\text{s}^{-1} & \text{if } x = 1 \\ 4.5 \times 10^5 \text{ M}^{-1}\text{s}^{-1} & \text{if } x = 2 \end{cases} \\ k_{\text{off}} &= \begin{cases} 10^{1-1.1y} \text{ s}^{-1} & \text{if } x = 1 \\ 10^{3-2y} \text{ s}^{-1} & \text{if } x = 2 \end{cases} \\ k_{\text{d}} &= 0.025 \text{ s}^{-1} \end{aligned} \quad (2)$$

These parameters led to three interpretations: First, the binding rate for 1-nt toehold staples is slower than that for 2-nt ones, both of which are slower than the binding rate of a strand displacement reaction (same as the rate of DNA hybridization<sup>5</sup>). This is likely because the entropic cost for parts of the invader and cover tiles bending out of the way to allow for toehold binding (Supplementary Figure 2a) makes it difficult for the first pair of staples to successfully make a contact. A longer sticky end makes it geometrically easier for the success, or energetically allows for the first contact to hang on long enough to zip up the rest of the staples rather than falling off immediately. Second, similar to strand displacement, the dissociation rate decreases exponentially with increasing number of nucleotides in the toehold, which depends on both the number of toehold staples and the length of each sticky end. However, with 0 toehold staples, the same invader dissociates faster if the base tile has 1-nt toehold staples, presumably because the spurious interactions between the branch migration domain in the invader and the toehold in the base tile is more significant for 2-nt toehold staples. Lastly, the displacement rate is approximately 40 times slower than a strand displacement reaction. This is not surprising because each branch migration step requires the dissociation of a stacking bond and a 2-nt sticky end in a staple rather than just a single nucleotide, and it requires both the invader and the cover tiles to adjust their degree of bending (Supplementary Figure 2a). Overall, the tile displacement reaction was completed along 65 nm of 22 helices on the edge of a DNA origami structure, a much larger scale compared to a typical strand displacement reaction along 7 nm of 21 base pairs.

Competitive tile displacement reactions shown in Fig. 2a were modeled as follows.

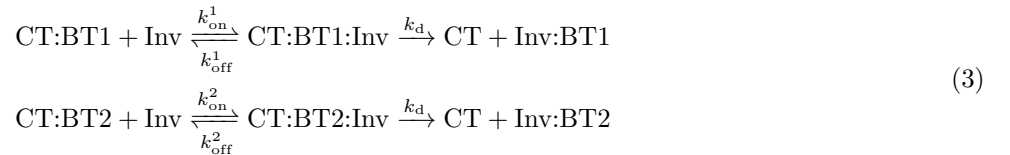

The same rate constants for the 1-nt 4-toehold-staple ( $x = 1$  and  $y = 4$ ) and 2-nt 4-toehold-staple ( $x = 2$  and  $y = 4$ ) reactions shown above were used here.

$$\begin{aligned} k_{\text{on}}^1 &= 2.5 \times 10^4 \text{ M}^{-1}\text{s}^{-1} \\ k_{\text{on}}^2 &= 4.5 \times 10^5 \text{ M}^{-1}\text{s}^{-1} \\ k_{\text{off}}^1 &= 10^{1-1.1 \times 4} = 4.0 \times 10^{-4} \text{ s}^{-1} \\ k_{\text{off}}^2 &= 10^{3-2 \times 4} = 10^{-5} \text{ s}^{-1} \\ k_{\text{d}} &= 0.025 \text{ s}^{-1} \end{aligned} \quad (4)$$



Sequential tile displacement reactions shown in Fig. 3a were modeled as follows.

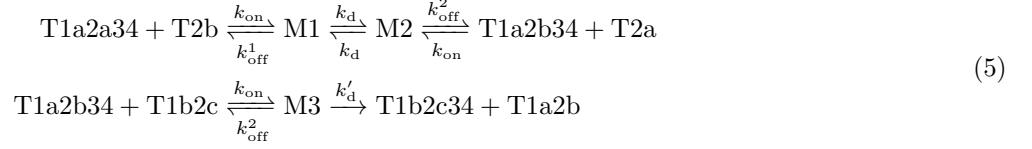

We used the same binding ( $x = 2$ ) and displacement rate constants obtained from the above experiments and revised the model to include a branch migration step across the corners of two adjacent tiles. We expect the rate of this step ( $k'_d$ ) to be slower than that within the same tile edge ( $k_d$ ), because the square DNA origami tile has an empty area near the corners and thus there should be an entropic cost for closing the gap, similar to the cost for closing a loop in DNA strands. We also used the same dissociation rate constant ( $x = 2$  and  $y = 4$ ) for the toehold between T1 and T2 ( $k_{\text{off}}^1$ ), but allowed that for the toehold between T2 and T3 to be different ( $k_{\text{off}}^2$ ). We found the following values of  $k_{\text{off}}^2$  and  $k'_d$  that agreed with the data reasonably well.

$$\begin{aligned}
k_{\text{on}} &= 4.5 \times 10^5 \text{ M}^{-1} \text{ s}^{-1} \\
k_{\text{off}}^1 &= 10^{-5} \text{ s}^{-1} \\
k_{\text{off}}^2 &= 10^{-4} \text{ s}^{-1} \\
k_d &= 0.025 \text{ s}^{-1} \\
k'_d &= 1.3 \times 10^{-4} \text{ s}^{-1}
\end{aligned} \tag{6}$$

Cooperative tile displacement reactions shown in Fig. 3c were modeled as follows. M2 and M4 are two possible intermediate states with one or the other invader branch migrated to the center of the array, both of which can reach a common intermediate state M5 where a second invader is now bound to the array. With another branch migration step, two tiles that are originally part of the array will be no longer attached and the two invaders will be fully bound as part of the reconfigured 2 by 2 array. Once reaching the final state, the process should become irreversible.

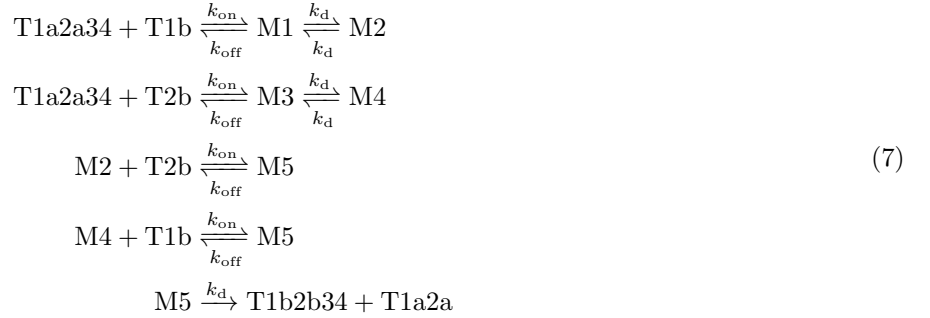

We used the same binding and displacement rate constants as above, but tuned the dissociation rate to better explain the kinetics observed from the fluorescence experiments.

$$\begin{aligned}
k_{\text{on}} &= 4.5 \times 10^5 \text{ M}^{-1} \text{ s}^{-1} \\
k_{\text{off}} &= 10^{-2} \text{ s}^{-1} \\
k_d &= 0.025 \text{ s}^{-1}
\end{aligned} \tag{8}$$

To explore the impact of invader dimerization, two additional reactions were introduced in a separate simulation (shown as the lighter yellow trajectory in Fig. 3d):

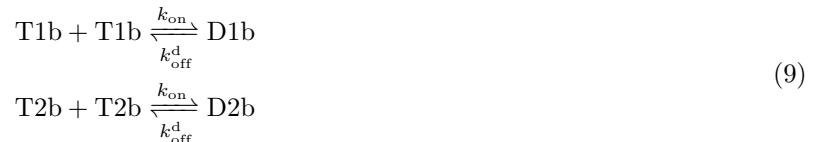

With dimer dissociation rate constant  $k_{\text{off}}^{\text{d}} = 3.2 \times 10^{-4} \text{ s}^{-1}$ , which is about 30 times slower than toehold dissociation, the simulation showed a decreased completion level of reconfiguration comparable to the experimental data. The reality is likely to be more complex: the invader dimer could still trigger tile displacement but at a much slower rate, similar to how four-way branch migration is much slower than three-way branch migration in strand displacement systems.

Corner, edge, and center tile displacement reactions shown in Fig. 4a were modeled as follows. For center tile displacement (last reaction), we only included the reaction steps along one edge and assumed that the same reaction steps along other edges will take place simultaneously.

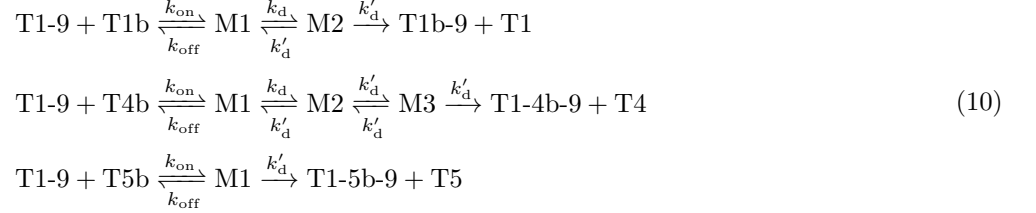

Compared to edges with continuous staples, the displacement rate constant  $k_{\text{d}}$  was estimated to be roughly 25 times slower for coded edges. All other rate constants remained the same.

$$\begin{aligned}
k_{\text{on}} &= 4.5 \times 10^5 \text{ M}^{-1} \text{ s}^{-1} \\
k_{\text{off}} &= 10^{-5} \text{ s}^{-1} \\
k_{\text{d}} &= 10^{-3} \text{ s}^{-1} \\
k'_{\text{d}} &= 1.3 \times 10^{-4} \text{ s}^{-1}
\end{aligned} \tag{11}$$

When a corner tile displacement reaction takes place after the adjacent edge tile (whose invader binds to this corner tile) has already been displaced, the second branch migration step will have to go through an additional toehold domain and thus become a bit slower (Supplementary Figure 7b). Similarly, when an edge tile displacement reaction takes place after the center tile has already been displaced (or after both the center tile and the relevant corner tile have been displaced), the second branch migration step (or both the second and third branch migration steps) will become a bit slower.

## Supplementary Note 2 | An earlier design of sequential reconfiguration

At first, to test the possibility of using coded edges as branch migration domains, which is necessary for the self-assembly of DNA origami arrays with increasing size,<sup>6,7</sup> we left out a few edge staples in all four pairs of edge interactions in the 2 by 2 array for demonstrating sequential tile displacement (Supplementary Figure 4a, e). However, unexpectedly, the one-step reaction starting from a 2 by 2 array that was already the product of the first step was almost as slow as the two steps in cascade (Supplementary Figure 4b). There was also a lack of delay in the two-step reaction as predicted by simulations.

What could have happened that was not as designed when the molecules were mixed together? We came up with a hypothesis of an alternative reconfiguration pathway (Supplementary Figure 4d): at the intermediate state M2, instead of proceeding with displacement across a tile corner, dissociation could occur and remove a tile from the 2 by 2 array, turning it into a three-tile complex. When the second invader arrives, it could then bind by an entire tile edge rather than a toehold and displace one tile from the three-tile complex, forming a 2 by 2 array that is the same as the designed product. In this pathway, the first tile being removed was the one with a quencher, and thus fluorescence signal would increase as soon as the first half of the pathway has been completed.

As this hypothesis would explain what we observed from the fluorescence kinetics experiments, we looked for evidence in an AFM experiment where the 2 by 2 arrays were mixed together with only the first invader. Two possible products of the alternative pathway, the three-tile complex and the dissociated two-tile complex, were both found in the images (Supplementary Figure 4e). Products from the designed (and alternative) pathway was estimated to be  $71.0 \pm 6.9\%$  (and  $22.6 \pm 3.6\%$ ) or  $56.4 \pm 6.0\%$  (and  $38.5 \pm 4.8\%$ ), comparing to the three-tile or two-tile complex, respectively. Comparing to the three-tile complex is likely to be an overestimate of the designed pathway because the complex could further dissociate into smaller structures. Comparing to the two-tile complex is likely to be an underestimate of the designed pathway because the complex looks similar to a spurious product of the excess invader tile binding to the displaced tile of the designed pathway. With these estimations, we concluded that the alternative pathway indeed played a significant role in the sequential reconfiguration.

Therefore, we redesigned the system to have continuous edge staples within the branch migration domains, which strengthened the binding between adjacent tiles that should be held together at any intermediate steps of the desired reaction pathway (Fig. 3a). As tile displacement reactions take place at room temperature, we need to consider possible aggregations of the invaders. In revising branch migration domains from coded edges to continuous edges, we also revised the two-tile invader to have just one rather than two branch migration domains to reduce aggregation.



## Supplementary Discussion

Three main difficulties have to be considered for scaling up tile displacement systems: First, in addition to the impurity of the staple strands, the yield of the DNA origami arrays before tile displacement (Supplementary Figure 16) also limits the success of reconfiguration. While previously developed criteria for assembling DNA origami arrays<sup>6,7</sup> remain useful, new criteria are required for creating arrays that are compatible with tile displacement. For example, we exclusively used staple extensions rather than truncations in toeholds on the invaders, for the purpose of promoting faster toehold binding with more molecular fluctuation of the free sticky ends as well as reducing spurious interactions among diverse invaders. For where the toeholds need to be in an array, the tiles may not satisfy the previously established giving and receiving rule.<sup>7</sup> Second, as reconfiguration takes place at room temperature, aggregation becomes more of a concern and limits the complexity of the invaders. For example, a two-tile invader with an uncovered toehold and branch migration domain across two tile edges (for example, the second invader in sequential tile displacement shown in Supplementary Figure 4a) could aggregate if the spurious interactions including a non-specific stacking bond in each staple is significant. Finally, because the displacement step, especially across a tile corner, is much slower than that in strand displacement reactions, it is important to evaluate if any intermediate states could lead to spurious reaction steps that would affect the desired reconfiguration.

Unlike in strand displacement where a reaction is initiated by matching domains in 1D (for example, a desired toehold next to a desired branch migration domain), specific 2D geometries are required to initiate a tile displacement reaction (for example, two adjacent branch migration domains in a 90 degree angle). This richness in geometry could be exploited to allow information-based reconfiguration to be carried out more efficiently and more robustly than otherwise possible.

Compared to other strategies for structural reconfiguration, for example incorporating flexible components<sup>8,9</sup> or manipulating individual strands in a DNA nanostructure,<sup>10–14</sup> tile displacement has distinct advantages for demonstrating reconfiguration in systems of multiple structures and for swapping in and out complex functional components without requiring disassembly and reassembly. For example, the arbitrary patterning capability of DNA origami has enabled the fabrication of functional components in devices with nanometer precision, including routing nanotubes<sup>15</sup> and polymers<sup>16</sup> for creating nanoscale electronic circuits, organizing metal nanoparticles<sup>17</sup> and nanorods<sup>18</sup> for creating nanoscale optical circuits,<sup>19</sup> and arranging quantum dots<sup>20</sup> for creating quantum-dot cellular automata.<sup>21,22</sup> In principle, tile displacement now opens up the possibility for complex components in these devices to be reconfigured and thus adapt their functions in response to given instructions. In these reconfiguration tasks, pre-fabricated components could be simply swapped in and out without changes in the spatial arrangement of the molecules tethered to individual tile surfaces, making the process highly efficient.

Furthermore, there is a fundamental difference between tile displacement and the possibility of reconfiguring multi-origami structures by using a set of DNA strands to disconnect some components and then reconnect others:<sup>23</sup> the former is intrinsically suited for information-based autonomous reconfiguration, while the latter would require DNA strands to be added to the test tube for each reconfiguration step. This difference is similar to that between nonautonomous<sup>24,25</sup> and autonomous<sup>26,27</sup> DNA walkers. Importantly, the ability to perform cascades of structural reconfiguration without external fuels (as shown in sequential reconfiguration) will allow artificial molecular machines to carry out sophisticated tasks by themselves. In principle, strand displacement circuits are also capable of directing self-assembly and reconfiguration without external fuels,<sup>28</sup> but there has been no experimental demonstration beyond simple self-assembly processes in a single step.<sup>29</sup>

Taking advantage of the autonomous reconfiguration, it should be possible to design an “intelligent” game board that can make a move in response to a human player’s move, similar to the classic tic-tac-toe game played by a deoxyribozyme-based automaton.<sup>30</sup> However, without the global information of all pieces that have been played, the molecular decision could only be made based on local information of the neighboring tiles. To enhance the capabilities of tile displacement, the reaction mechanism could be combined with DNA strand displacement: a single-stranded output signal could be released upon completion of a tile displacement reaction, triggering computation carried out by a DNA circuit, similar to the self-assembly-triggered chemical reactions discussed in a theoretical model.<sup>28</sup> The circuit output could then be programmed to activate sticky ends<sup>29</sup> of a toehold domain on a tile and trigger another tile displacement reaction, allowing dynamic behaviors at different scales to be integrated together. As articulated in spatially-organized DNA circuits<sup>31</sup> and robots,<sup>32</sup> parallel behaviors could be obtained with the compartmentalization provided by DNA nanostructures. The integration of tile displacement and strand displacement could further allow these parallel behaviors to involve structural reconfiguration, for example the robots could send a signal to swap structures after the task on a particular structure has been completed.

## Supplementary Tables

Supplementary Table 1 | Interior staples.

| Strand name | Sequence                                 |
|-------------|------------------------------------------|
| Reg-T1R01C6 | TCATTTGCTAATAGTAGTAGCATT                 |
| Reg-T1R03C5 | CAACTAAAGTACGGTGGGATGGCT                 |
| Reg-T1R03C6 | TTTCATTGAGTAGATTTAGTTTCTATATTT           |
| Reg-T1R04C5 | TAGAGCTTCAGACCGGAAGCAAACCTATTATA         |
| Reg-T1R05C6 | GTCAGGAAGAGGTCATTTTTGCTCTGGAAG           |
| Reg-T1R06C3 | TTAAGAGGGTCCAATACTGCGGATAGCGAG           |
| Reg-T1R06C5 | GTCAGAAGATTGAATCCCCCTCAACCTCGTTT         |
| Reg-T1R07C4 | AAATATTCCAAAGCGGATTGCATCGAGCTTCA         |
| Reg-T1R07C6 | AACAGTTAGGTCTTTACCCTGATCCAACAG           |
| Reg-T1R08C3 | AGGCTTTTCAGGTAGAAAGATTCAATTACC           |
| Reg-T1R08C5 | ACCAGACGGAATACCACATTCAACGAGATGGT         |
| Reg-T1R09C2 | CATTATTAGCAAAAGAAGTTTTGC                 |
| Reg-T1R09C4 | AGATTTAGACGATAAAAAACAAAAATCGTCAT         |
| Reg-T1R09C6 | ATACATACAACACTATCATAACATGCTTTA           |
| Reg-T1R10C1 | AGTCAGGACATAGGCTGGCTGACCTTTGAAAG         |
| Reg-T1R10C3 | TTATGCGATTGACAAGAACCGGAGGTCAAT           |
| Reg-T1R10C5 | TTAATTTCCAACGTAACAAAGCTGTCCATGTT         |
| Reg-T1R11C2 | GAGTAATCTTTTAAGAACTGGCTCCGGAACAA         |
| Reg-T1R11C4 | ACCCAAATAACTTTAATCATTGTGATCAGTTG         |
| Reg-T1R11C6 | GTGAATATAGTAAATTGGGCTTTAATGCAG           |
| Reg-T1R12C3 | CATAAGGGACACTAAAACACTCACATTAAA           |
| Reg-T1R12C5 | ACTTAGCCATTATACCAAGCGCGAGAGGACTA         |
| Reg-T1R13C2 | AAAAGAATAACCGAACTGACCAACTTCATCAA         |
| Reg-T1R13C4 | CCCCAGCGGGAACGAGGCGCAGACTATTCAAT         |
| Reg-T1R13C6 | ACAACGGAAATCCGCGACCTGCCTCATTCA           |
| Reg-T1R14C3 | CGGGTAAAATTTCGGTCGCTGAGGAATGACA          |
| Reg-T1R14C5 | AAGACTTTGGCCGCTTTTTCGGGATTAAACAG         |
| Reg-T1R15C4 | GAGTTAAATTCATGAGGAAGTTTCTCTTTGAC         |
| Reg-T1R15C6 | CTCAGCAGGCTACAGAGGCTTTAACAAAGT           |
| Reg-T1R16C5 | CTTGATACTGAAAATCTCCAAAAAAGCGGAGT         |
| Reg-T1R17C4 | TTTCACGTCGATAGTTGCGCCGACCTTGCAGG         |
| Reg-T1R17C6 | CAAAAGGTTTCGAGGTGAATTTCTCGTCACC          |
| Reg-T1R19C6 | GTTAGTAACTTTCAACAGTTTCAAAGGCTC           |
| Reg-T1R21C5 | CCATGTACCGTAACACTGTAGCATTCCACAGATTCCAGAC |
| Reg-T2R01C6 | ACCTTCATTTCAGGGATAGCAAGCC                |
| Reg-T2R03C5 | TTAGGATTAGCGGGGTGGAACCTA                 |
| Reg-T2R03C6 | GTACCAGGTATAGCCCGGAATAGAACCGCC           |
| Reg-T2R04C5 | TTATTCTGACTGGTAATAAGTTTAAACAAATA         |
| Reg-T2R05C6 | CAGTGCCCCCTGCCTATTTCTTTGCTCA             |
| Reg-T2R06C3 | GTCTCTGACACCCTCAGAGCCACATCAAAA           |
| Reg-T2R06C5 | AATCCTCAACCAGAACCACCAGCCCCCTT            |
| Reg-T2R07C4 | GAGCCGCCTTAAAGCCAGAATGGAGATGATAC         |
| Reg-T2R07C6 | GCCAGCAGCCTTGATATTCACAAACGGGGT           |
| Reg-T2R08C3 | TCACCGGAAACGTCACCAATGAATTATTCA           |
| Reg-T2R08C5 | ATTAGCGTCCGTAATCAGTAGCGAATTGAGGG         |
| Reg-T2R09C2 | AGGCCGGAACCAGAGCCACCACCG                 |
| Reg-T2R09C4 | TAGCAGCATTGCCATCTTTTCATACACCCTCA         |
| Reg-T2R09C6 | AGTTTGCGCATTTTCGGTCATAGAGCCGCC           |
| Reg-T2R10C1 | GCCATTTGCAAACGTAGAAAAATACCTGGCATG        |
| Reg-T2R10C3 | TTAAAGGTACATATAAAAGAAACAAACGCA           |
| Reg-T2R10C5 | AGGGAAGGATAAGTTTATTTTGTGAGCCGAAC         |
| Reg-T2R11C2 | AGGTGGCAGAATTATCACCGTCACCATTAGCA         |
| Reg-T2R11C4 | ACCACGGATAAATATTGACGGAAAACCATCGA         |

| Strand name | Sequence                                 |
|-------------|------------------------------------------|
| Reg-T2R11C6 | TAGAAAAGGCGACATTCAACCGCAGAATCA           |
| Reg-T2R12C3 | ATAATAACTCAGAGAGATAACCCGAAGCGC           |
| Reg-T2R12C5 | AAAGTTACGCCCAATAATAAGAGCAGCCTTA          |
| Reg-T2R13C2 | CGCTAATAGGAATACCCAAAAGAAATACATAA         |
| Reg-T2R13C4 | TGAGTTAACAGAAGGAAACCGAGGGCAAAGAC         |
| Reg-T2R13C6 | ATGAAATGAAAAGTAAGCAGATACAATCAA           |
| Reg-T2R14C3 | ATTAGACGGAGCGTCTTTCCAGAGCTACAA           |
| Reg-T2R14C5 | CAGAGAGAACAAAATAAACAGCCATTAAATCA         |
| Reg-T2R15C4 | TGCCAGTTATAACATAAAAACAGGACAAGAAT         |
| Reg-T2R15C6 | ATCCCAAAAAAATGAAAATAGCAAGAAACA           |
| Reg-T2R16C5 | AGATTAGTATATAGAAGGCTTATCCAAGCCGT         |
| Reg-T2R17C4 | CAAATCAGTGCTATTTTGCACCCAGCCTAATT         |
| Reg-T2R17C6 | TAAGAACGGAGGTTTGAAGCCTATTATTT            |
| Reg-T2R19C6 | CTTATCACTCATCGAGAACAAGCGGTATTC           |
| Reg-T2R21C5 | AGCTAATGCAGAACGCGAGAAAAATAATATCCTGTCTTTC |
| Reg-T3R01C6 | AGAATATCAGACGACGACAATAAA                 |
| Reg-T3R03C5 | TCATATGCGTTATACAAAGGCGTT                 |
| Reg-T3R03C6 | CCAGTATGAATCGCCATATTTAGTAATAAG           |
| Reg-T3R04C5 | AAATAAGAACTTTTTCAAATATATCTGAGAGA         |
| Reg-T3R05C6 | ATTTTCATGACCGTGTGATAAATAATTCTTA          |
| Reg-T3R06C3 | TATATAACGTAAATCGTCGCTATATTTGAA           |
| Reg-T3R06C5 | CTACCTTTAGAATCCTTGAAAACAAGAAAACA         |
| Reg-T3R07C4 | TTTCCCTTTTAACCTCCGGCTTAGCAAAGAAC         |
| Reg-T3R07C6 | GCTTAGAATCAAAATCATAGGTTTTAGTTA           |
| Reg-T3R08C3 | TTACCTTTACAATAACGGATTTCGCAAAATT          |
| Reg-T3R08C5 | AAATTAATACCAAGTTACAAAATCCTGAATAA         |
| Reg-T3R09C2 | CGGGAGAATTTAATGGAAACAGTA                 |
| Reg-T3R09C4 | CTTTGAATTACATTTAACAATTTCTAATTAAT         |
| Reg-T3R09C6 | GCGAATTATGAAACAAACATCATAGCGATA           |
| Reg-T3R10C1 | GTAGATTGTTATTAATTTTAAAAACAATTC           |
| Reg-T3R10C3 | ATTTGCACCATTTTGCAGGAACAAATTTGAG          |
| Reg-T3R10C5 | TGGAAGGGAGCGGAATTATCATCAACTAATAG         |
| Reg-T3R11C2 | AACATTATGTAAACAGAAATAAATTTTACAT          |
| Reg-T3R11C4 | CCAGAAGGTTAGAACCTACCATATCCTGATTG         |
| Reg-T3R11C6 | ATTATCAGTTTGGATTATACTTGGCGCAGAG          |
| Reg-T3R12C3 | GATTTAGATTGCTGAACCTCAAAGTATTAA           |
| Reg-T3R12C5 | ATTAGAGCAATATCTGGTCAGTTGCAGCAGAA         |
| Reg-T3R13C2 | GCATCACCAGTATTAGACTTTACAGTTTGAGT         |
| Reg-T3R13C4 | CCTCAATCCGTCAATAGATAATACAGAAACCA         |
| Reg-T3R13C6 | ACAGTTGTTAGGAGCACTAACATATTCCTG           |
| Reg-T3R14C3 | CACCGCCTGAAAGCGTAAGAATACATTCTG           |
| Reg-T3R14C5 | GATAAACTTTTTGAATGGCTATTTTCACCAG          |
| Reg-T3R15C4 | AGACAATAAGAGGTGAGGCGTCATATCAAAC          |
| Reg-T3R15C6 | ATGCGCGTACCGAACGAACCACGCAAATCA           |
| Reg-T3R16C5 | TCACACGATGCAACAGGAAAAACGGAAGAACT         |
| Reg-T3R17C4 | CCAGCCATCCAGTAATAAAAGGGACGTGGCAC         |
| Reg-T3R17C6 | AATACCTATTTACATTGGCAGAAAGTCTTTA          |
| Reg-T3R19C6 | TTAACCGTCACTTGCTGAGTACTCATGGA            |
| Reg-T3R21C5 | CTAAACAGGAGGCCGATAATCCTGAGAAGTGTACGCAAA  |
| Reg-T4R01C6 | GCGCGTACTTTTCTCGTTAGAATC                 |
| Reg-T4R03C5 | AAAGCCGGCGAACGTGTGCCGTAA                 |
| Reg-T4R03C6 | GGAAGGGGGCAAGTGTAGCGGTGCTACAGG           |
| Reg-T4R04C5 | AGCACTAAAAAGGGCGAAAAACCGAAATCCCT         |
| Reg-T4R05C6 | GGCGATGTTTTTGGGGTCGAGGGCGAGAAA           |
| Reg-T4R06C3 | TGAGTGTTTCAGCTGATTGCCCTTGCGCGGG          |
| Reg-T4R06C5 | TATAAATCGAGAGTTGCAGCAAGCGTCGTGCC         |
| Reg-T4R07C4 | GGCCCTGAAAAAGAATAGCCCGAGCGTGGACT         |



| Strand name | Sequence                                 |
|-------------|------------------------------------------|
| Reg-T4R07C6 | CTGGTTTGTTCCGAAATCGGCATCTATCAG           |
| Reg-T4R08C3 | GAGAGGCGACAACATACGAGCCGCTGCAGG           |
| Reg-T4R08C5 | AGCTGCATAGCCTGGGGTGCCTAAGTAAAACG         |
| Reg-T4R09C2 | AATTCCACGTTTGGCTATTGGGCG                 |
| Reg-T4R09C4 | AAGTGTAAATAATGAATCGGCCAACCAACCGCCT       |
| Reg-T4R09C6 | CTAACTCCCAGTCGGGAAACCTGGTCCACG           |
| Reg-T4R10C1 | GAATTCGTGCCATTGCCATTAGTTCCGGCA           |
| Reg-T4R10C3 | TCGACTCTGAAGGGCGATCGGTGCGGCCTC           |
| Reg-T4R10C5 | ACGGCCAGTACGCCAGCTGGCGAACATCTGCC         |
| Reg-T4R11C2 | ACTGTTGGAGAGGATCCCCGGGTACCGCTCAC         |
| Reg-T4R11C4 | TTGCTATTGCCAAGCTTGCATGCGAAGCATA          |
| Reg-T4R11C6 | GTGCTGCCCCAGTCACGACGTTTGAGTGAG           |
| Reg-T4R12C3 | AGGAAGATCATTAAATGTGAGCGTTTTTAA           |
| Reg-T4R12C5 | AGTTTGAGATTCTCCGTGGGAACAATTCGCAT         |
| Reg-T4R13C2 | TTCATCAACGCACTCCAGCCAGCTGCTGCGCA         |
| Reg-T4R13C4 | CCCGTCGGGGGACGACGACAGTATCGGGCCTC         |
| Reg-T4R13C6 | ATTGACCCGCATCGTAACCGTGAGGGGGAT           |
| Reg-T4R14C3 | CCAATAGGAAACTAGCATGTCAAGGAGCAA           |
| Reg-T4R14C5 | TAAATTTTGTATAATCAGAAAAGCACAAGGC          |
| Reg-T4R15C4 | ACCCCGGTTGTTAAATCAGCTCATAGTAACAA         |
| Reg-T4R15C6 | CAGGAAGTAATATTTTGTAAAAACGGCGG            |
| Reg-T4R16C5 | TATCAGGTAAATCACCATCAATATCAATGCCT         |
| Reg-T4R17C4 | AGACAGTCCATTGCCTGAGAGTCTTCATATGT         |
| Reg-T4R17C6 | ACCGTTCATTTTGTAGAGATCTCCCAAAAA           |
| Reg-T4R19C6 | CCTTTATCATATATTTTAAATGGATATTCA           |
| Reg-T4R21C5 | AATCATACAGGCAAGGCAGAGCATAAAGCTAAGGGAGAAG |

Supplementary Table 2 | Bridge staples.

| Strand name | Sequence                                                    |
|-------------|-------------------------------------------------------------|
| Bri-T1R02C5 | GATACATTTGCTTTTTTGACCCTGTAAT                                |
| Bri-T1R05C4 | AAGCGAACAATTGCTGAATATAATGCTGTATTTTTTGTGAGAAAGGCCGG          |
| Bri-T1R07C2 | TGGATAGCAAGCCCGATTTTAAATCGTAAACGCCAT                        |
| Bri-T1R08C1 | CAGAGGGGGTTTTGCCTTCCTGTAGCCAGCT                             |
| Bri-T1R12C1 | AGGACAGATGATTTTTTCACCAGTAGCACCATTACCGACTTGA                 |
| Bri-T1R14C2 | TGCCACTACTTTTTTGGCCACCCTC                                   |
| Bri-T1R16C3 | ACAACCATTTTTTCATACATGGCTTTTAAGCGCA                          |
| Bri-T1R18C5 | GAGAATAGAAAGGAACAACACTATTTTCTCAAGAGAAGGA                    |
| Bri-T1R19C5 | TGTCGTCTCAGCCCTCATATTTTTTCGCCACCCTCAGGTGTATC                |
| Bri-T2R02C5 | ACCGTACTCAGGTTTTTGATCTAAAGTTT                               |
| Bri-T2R05C4 | AGGAGTGTAACATGAAAGTATTAAGAGGCTTTTTTGGCAATAATAATTT           |
| Bri-T2R07C2 | AGAACCGCATTTACCGTTTTACCGATATATACGTAA                        |
| Bri-T2R08C1 | GAACCGCTCTTTACCTAAAACGAAAGAGGC                              |
| Bri-T2R10C0 | GGAATTAGAGCTTTTTTTCAGACCAGGCGCTTGGAAGATTTTTTCCAGGCAAAGC     |
| Bri-T2R12C1 | ATTAAGACTCCTTTTTAATATACAGTAACAGTACCGAAATTGC                 |
| Bri-T2R14C2 | AACTGAACATTTTTTTGAATAACC                                    |
| Bri-T2R16C3 | TTTTATCTTTTTATCCAATCGCAAGAGTTGGGT                           |
| Bri-T2R18C5 | TTTTATTTTCATCGTAGGAATTTTAGCCTGTTAGTA                        |
| Bri-T2R19C5 | TAATCGGCCATCCTAATTTTTTTTTTTTTTCGAGCCAACAACGCC               |
| Bri-T3R02C5 | AACATGTAATTTTTTTGAAACCAATCAA                                |
| Bri-T3R05C4 | GCGAGAAAATAAACACCGGAATCATAATTATTTTTTCGCCCAATAGCAAG          |
| Bri-T3R07C2 | TTGCTTCTTATATGTATTTTACGCTAACGGAGAATT                        |
| Bri-T3R08C1 | CATAAATCAATTTAGTCAGAGGGTAATTGAG                             |
| Bri-T3R12C1 | GACAACTCGTATTTTTTCTGTGTGAAATTGTTATCCGAGCTC                  |
| Bri-T3R14C2 | GCCACGCTGTTTTTTTACCAGTGAG                                   |
| Bri-T3R16C3 | GCCAACATTTTTTCCACTATTAAAGAAATAGGGT                          |
| Bri-T3R18C5 | CAAACTATCGGCCTTGCTGGTTTTTGAGCTTGACGGGG                      |
| Bri-T3R19C5 | CTGTCCATTTTTATAATCATTTTTTTCTTAATGCGCCCACGCTGC               |
| Bri-T4R02C5 | GCGTAACCACCATTTTTGAGTAAAAGAGT                               |
| Bri-T4R05C4 | CCAACGTCATCGGAACCCTAAAGGGAGCCCTTTTTTTGAACAATATTACCG         |
| Bri-T4R07C2 | ACGGGCAAGTTCAGTTTTTCTGACCTGCAACAGT                          |
| Bri-T4R08C1 | CCAGGGTGGTTTTGCAAAATGAAAAATCTAAA                            |
| Bri-T4R10C0 | AATCATGGTCATTTTTTTTTTGCCCGAACTCAGGTTTAACTTTTTTTTCAGTATGTTAG |
| Bri-T4R12C1 | CCGCTTCTGGTTTTTTTCGTAAATAAAACGAACTAAATTATACC                |
| Bri-T4R14C2 | CAAAAATAATTTTTTTGTTTAGAC                                    |
| Bri-T4R16C3 | ACAAGAGTTTTTTTCGCGTTTAAATCAAAAAGA                           |
| Bri-T4R18C5 | GAGTAATGTGTAGGTAAAGATTTTTTGTTTTAAATATG                      |
| Bri-T4R19C5 | ACTTTTGCAATCGGTTGTACTTTTTTAAACCTGTTTAGGACCATTA              |



Supplementary Table 3 | Edge staples.

| Strand name    | Sequence                            |
|----------------|-------------------------------------|
| Edg-2G1T3C7R00 | GTGTAAAGTAATTCTGTCAAAGTACCGACAAAAG  |
| Edg-2G1T3C7R02 | ATAGTAGGGCTTAATTGAAAAGCCAACGCTCAAC  |
| Edg-2G1T3C7R04 | TCAATGGTTTGAAATACCCTTCTGACCTAAATTT  |
| Edg-2G1T3C7R06 | CGAGTCAATAGTGAATTTTTAAGACGCTGAGAAG  |
| Edg-2G1T3C7R08 | GCTGAGCAAAAGAAGATGATTCAATTTCAATTACC |
| Edg-2G1T3C7R10 | GACAATATAATCCTGATTGATGATGGCAATTCAT  |
| Edg-2G1T3C7R12 | TAGTTATCTAAAAATCTAAAGGAATTGAGGAAG   |
| Edg-2G1T3C7R14 | GAACATCGCCATTAAAAAACTGATAGCCCTAAA   |
| Edg-2G1T3C7R16 | TATCGTCTGAAATGGATTACATTTTGACGCTCAA  |
| Edg-2G1T3C7R18 | ATTTGATTAGTAATAACATTGTAGCAATACTTCT  |
| Edg-2G1T3C7R20 | AAAGGAACGGTACGCCAGTAAAGGGATTTAGAC   |
| Edg-2G1T4C7R00 | GTGAGCACGTATAACGTGCTATGGTTGCTTTGAC  |
| Edg-2G1T4C7R04 | TCATCACCCAAATCAAGTGCCCACTACGTGAACC  |
| Edg-2G1T4C7R10 | GAGTAACGCCAGGGTTTTAAGGCGATTAAGTTGG  |
| Edg-2G1T4C7R14 | GATTTAAATTGTAAACGTATTGTATAAGCAAATA  |
| Edg-2G1T4C7R16 | TAGCCGAGAGGGTAGCTTAGCTGATAAATTAAT   |
| Edg-2G1T4C7R20 | AATAAGCAATAAAGCCTCAAAGAATTAGCAAAAT  |
| Edg-2G2T1C7R00 | ATGGTGGCATCAATTCTAGGGCGCGAGCTGAAAA  |
| Edg-2G2T1C7R02 | ATTCCAATTCTGCGAACCCATATAACAGTTGAT   |
| Edg-2G2T1C7R06 | GACCATAAATCAAAAATCCAGAAAACGAGAATGA  |
| Edg-2G2T1C7R10 | CAGAAACACCAGAACGAGAGGCTTGCCCTGACGA  |
| Edg-2G2T1C7R12 | TGCTGATAAATTGTGTCGAGATTTGTATCATCGC  |
| Edg-2G2T1C7R14 | AGGAACGAGGGTAGCAACGCGAAAGACAGCATCG  |
| Edg-2G2T1C7R16 | CCGGTTATCAGCTTGCTAGCCTTTAATTGTATC   |
| Edg-2G2T1C7R18 | TCGGGATTTTGCTAAACAAATGAATTTTCTGTAT  |
| Edg-2G2T1C7R20 | AGACAAACTACAACGCCTGAGTTTCGTCAACCAGT |
| Edg-2G2T3C7R00 | ATGTAAAGTAATTCTGTCAAAGTACCGACAAAAG  |
| Edg-2G2T3C7R02 | ATAGTAGGGCTTAATTGAAAAGCCAACGCTCAAC  |
| Edg-2G2T3C7R04 | CGAATGGTTTGAAATACCCTTCTGACCTAAATTT  |
| Edg-2G2T3C7R06 | GAAGTCAATAGTGAATTTTTAAGACGCTGAGAAG  |
| Edg-2G2T3C7R08 | TATGAGCAAAAGAAGATGATTCAATTTCAATTACC |
| Edg-2G2T3C7R10 | CACAATATAATCCTGATTGATGATGGCAATTCAT  |
| Edg-2G2T3C7R12 | TGGTTATCTAAAAATCTAAAGGAATTGAGGAAG   |
| Edg-2G2T3C7R14 | AGACATCGCCATTAAAAAACTGATAGCCCTAAA   |
| Edg-2G2T3C7R16 | CCTCGTCTGAAATGGATTACATTTTGACGCTCAA  |
| Edg-2G2T3C7R18 | TCTTGATTAGTAATAACATTGTAGCAATACTTCT  |
| Edg-2G2T4C7R00 | ATGAGCACGTATAACGTGCTATGGTTGCTTTGAC  |
| Edg-2G2T4C7R02 | ATCGGGCGCTAGGGCGCTAAGAAAGCGAAAGGAG  |
| Edg-2G2T4C7R04 | CGATCACCCAAATCAAGTGCCCACTACGTGAACC  |
| Edg-2G2T4C7R06 | GAATCCTGTTTGATGGTGGCCCCAGCAGGCGAAA  |
| Edg-2G2T4C7R08 | TAGCTCACTGCCCCGCTTTACATTAATTGCGTTGC |
| Edg-2G2T4C7R10 | CAGTAACGCCAGGGTTTTAAGGCGATTAAGTTGG  |
| Edg-2G2T4C7R12 | TGCGTTGGTGTAGATGGGGTAATGGGATAGGTCA  |
| Edg-2G2T4C7R14 | AGTTTAAATTGTAAACGTATTGTATAAGCAAATA  |
| Edg-2G2T4C7R16 | CCGCCGAGAGGGTAGCTTAGCTGATAAATTAAT   |
| Edg-2G2T4C7R18 | TCAAATTTTTAGAACCCTTTCAACGCAAGGATAA  |
| Edg-2G2T4C7R20 | AGTAAGCAATAAAGCCTCAAAGAATTAGCAAAAT  |
| Edg-2G3T1C7R00 | ACGGTGGCATCAATTCTAGGGCGCGAGCTGAAAA  |
| Edg-2G3T1C7R02 | CTTCCCAATTCTGCGAACCCATATAACAGTTGAT  |
| Edg-2G3T1C7R04 | AAATTGCTCCTTTTGATATTAGAGAGTACCTTTA  |
| Edg-2G3T1C7R06 | AACCATAAATCAAAAATCCAGAAAACGAGAATGA  |
| Edg-2G3T1C7R08 | AGCGAGGCATAGTAAGAGACGCCAAAAGGAATTA  |
| Edg-2G3T1C7R10 | ATGAAACACCAGAACGAGAGGCTTGCCCTGACGA  |
| Edg-2G3T1C7R12 | CCCTGATAAATTGTGTCGAGATTTGTATCATCGC  |
| Edg-2G3T1C7R14 | AGGAACGAGGGTAGCAACGCGAAAGACAGCATCG  |

| Strand name    | Sequence                            |
|----------------|-------------------------------------|
| Edg-2G3T1C7R16 | TTGGTTTATCAGCTTGCTAGCCTTTAATTGTATC  |
| Edg-2G3T1C7R18 | ACGGGATTTTGCTAAACAAATGAATTTTCTGTAT  |
| Edg-2G3T1C7R20 | AGACAAACTACAACGCCTGAGTTTCGTACCCAGT  |
| Edg-2G3T3C7R00 | ACGTAAAGTAATTCTGTCAAAGTACCGACAAAAG  |
| Edg-2G3T3C7R02 | CTAGTAGGGCTTAATTGAAAAGCCAACGCTCAAC  |
| Edg-2G3T3C7R04 | AAAATGGTTTGAAATACCCTTCTGACCTAAATTT  |
| Edg-2G3T3C7R06 | AAAGTCAATAGTGAATTTTTAAGACGCTGAGAAG  |
| Edg-2G3T3C7R08 | AGTGAGCAAAAGAAGATGATTCATTTCAATTACC  |
| Edg-2G3T3C7R10 | ATCAATATAATCCTGATTGATGATGGCAATTCAT  |
| Edg-2G3T3C7R12 | CCGTTATCTAAAAATATCTAAAGGAATTGAGGAAG |
| Edg-2G3T3C7R14 | AGACATCGCCATTAATAAAAACTGATAGCCCTAAA |
| Edg-2G3T3C7R16 | TTTCGTCTGAAATGGATTACATTTTGACGCTCAA  |
| Edg-2G3T3C7R18 | ACTTGATTAGTAATAACATTGTAGCAATACTTCT  |
| Edg-2G3T3C7R20 | AGAGGAACGGTACGCCAGTAAAGGGATTTTAGAC  |
| Edg-2G4T2C7R00 | ATAGCCACCACCCTCATTGAACCGCCACCCTCAG  |
| Edg-2G4T2C7R02 | AAGAGAGGGTTGATATAAGCGGATAAGTGCCGTC  |
| Edg-2G4T2C7R04 | ATGTATAAACAGTTAATGTTGAGTAACAGTGCCC  |
| Edg-2G4T2C7R06 | TAGCAGGTCAGACGATTGTTGACAGGAGGTTGAG  |
| Edg-2G4T2C7R08 | CATAGCGCGTTTTTCATCGCTTTAGCGTCAGACTG |
| Edg-2G4T2C7R10 | GGGCGCCAAAGACAAAAGTTTCATATGGTTTACCA |
| Edg-2G4T2C7R12 | GCCCGAAGCCCTTTTTAAAGCAATAGCTATCTTA  |
| Edg-2G4T2C7R14 | AATTTTTTGTTTTAACGTCTCCAAATAAGAAACGA |
| Edg-2G4T2C7R16 | CCAACCTCCCGACTTGCGGCGAGGCGTTTTAGCG  |
| Edg-2G4T2C7R18 | AGTAAACCAAGTACCGCATTCCAAGAACGGGTAT  |
| Edg-2G4T2C7R20 | ACAGATAAGTCCTGAACACCTGTTTATCAACAAT  |
| Edg-2G4T4C7R00 | ATGAGCACGTATAACGTGCTATGGTTGCTTTGAC  |
| Edg-2G4T4C7R02 | AACGGGCGCTAGGGCGCTAAGAAAGCGAAAGGAG  |
| Edg-2G4T4C7R04 | ATATCACCCAAATCAAGTGCCCACTACGTGAACC  |
| Edg-2G4T4C7R06 | TAATCCTGTTTGATGGTGGCCCCAGCAGGCGAAA  |
| Edg-2G4T4C7R12 | GCCGTTGGTGTAGATGGGGTAAATGGGATAGGTCA |
| Edg-2G4T4C7R16 | CCGCCGGAGAGGGTAGCTTAGCTGATAAATTAAT  |
| Edg-2G4T4C7R20 | ACTAAGCAATAAAGCCTCAAAGAATTAGCAAAAAT |
| Edg-2bRT1C7R00 | GGTGGCATCAATTCTAGGGCGCGAGCTGAA      |
| Edg-2bRT1C7R02 | TCCCAATTCTGCGAACCCATATAACAGTTG      |
| Edg-2bRT1C7R04 | ATTGCTCCTTTTGATATTAGAGAGTACCTT      |
| Edg-2bRT1C7R06 | CCATAAATCAAAAATCCAGAAAACGAGAAT      |
| Edg-2bRT1C7R08 | CGAGGCATAGTAAGAGACGCCAAAAGGAAT      |
| Edg-2bRT1C7R10 | GAAACACCAGAACGAGAGGCTTGCCCTGAC      |
| Edg-2bRT1C7R12 | CTGATAAATTGTGTCGAGATTTGTATCATC      |
| Edg-2bRT1C7R14 | GAACGAGGGTAGCAACGCGAAAGACAGCAT      |
| Edg-2bRT1C7R16 | GGTTTATCAGCTTGCTAGCCTTTAATTGTA      |
| Edg-2bRT1C7R18 | GGGATTTTGCTAAACAAATGAATTTTCTGT      |
| Edg-2bRT1C7R20 | ACAAACTACAACGCCTGAGTTTCGTACCA       |
| Edg-2bRT2C7R00 | AGCCACCACCCTCATTGAACCGCCACCCTC      |
| Edg-2bRT2C7R02 | GAGAGGGTTGATATAAGCGGATAAGTGCCG      |
| Edg-2bRT2C7R04 | GTATAAACAGTTAATGTTGAGTAACAGTGC      |
| Edg-2bRT2C7R06 | GCAGGTCAGACGATTGTTGACAGGAGGTTG      |
| Edg-2bRT2C7R08 | TAGCGCGTTTTTCATCGCTTTAGCGTCAGAC     |
| Edg-2bRT2C7R10 | GCGCCAAAGACAAAAGTTTCATATGGTTTAC     |
| Edg-2bRT2C7R12 | CCGAAGCCCTTTTTAAAGCAATAGCTATCT      |
| Edg-2bRT2C7R14 | TTTTTTGTTTTAACGTCTCCAAATAAGAAAC     |
| Edg-2bRT2C7R16 | AACCTCCCGACTTGCGGCGAGGCGTTTTAG      |
| Edg-2bRT2C7R18 | TAAACCAAGTACCGCATTCCAAGAACGGGT      |
| Edg-2bRT2C7R20 | AGATAAGTCCTGAACACCTGTTTATCAACA      |
| Edg-2bRT3C7R00 | GTAAAGTAATTCTGTCAAAGTACCGACAAA      |
| Edg-2bRT3C7R02 | AGTAGGGCTTAATTGAAAAGCCAACGCTCA      |
| Edg-2bRT3C7R04 | AATGGTTTGAAATACCCTTCTGACCTAAAT      |



| Strand name     | Sequence                               |
|-----------------|----------------------------------------|
| Edg-2bRT3C7R06  | AGTCAATAGTGAATTTTTAAGACGCTGAGA         |
| Edg-2bRT3C7R08  | TGAGCAAAAGAAGATGATTCATTTCAATTA         |
| Edg-2bRT3C7R10  | CAATATAATCCTGATTGATGATGGCAATTC         |
| Edg-2bRT3C7R12  | GTTATCTAAAATATCTAAAGGAATTGAGGA         |
| Edg-2bRT3C7R14  | ACATCGCCATTAAAAAACTGATAGCCCTA          |
| Edg-2bRT3C7R16  | TCGTCTGAAATGGATTACATTTTGACGCTC         |
| Edg-2bRT3C7R18  | TTGATTAGTAATAACATTGTAGCAATACTT         |
| Edg-2bRT3C7R20  | AGGAACGGTACGCCAGTAAAGGGATTTTAG         |
| Edg-2bRT4C7R00  | GAGCACGTATAACGTGCTATGGTTGCTTTG         |
| Edg-2bRT4C7R02  | CGGGCGCTAGGGCGCTAAGAAAGCGAAAGG         |
| Edg-2bRT4C7R04  | ATCACCCAAATCAAGTGCCCACTACGTGAA         |
| Edg-2bRT4C7R06  | ATCCTGTTTGATGGTGGCCCCAGCAGGCGA         |
| Edg-2bRT4C7R08  | GCTCACTGCCCGCTTTACATTAATTGCGTT         |
| Edg-2bRT4C7R10  | GTAACGCCAGGGTTTTAAGGCGATTAAGTT         |
| Edg-2bRT4C7R12  | CGTTGGTGTAGATGGGGTAATGGGATAGGT         |
| Edg-2bRT4C7R14  | TTTAAATTGTAAACGTATTGTATAAGCAAA         |
| Edg-2bRT4C7R16  | GCCGGAGAGGGTAGCTTAGCTGATAAATTA         |
| Edg-2bRT4C7R18  | AAATTTTGTAGAACCCTTTCAACGCAAGGAT        |
| Edg-2bRT4C7R20  | TAAGCAATAAAGCCTCAAAGAATTAGCAAA         |
| Edg-1bRT2C7R14  | TTTTTTGTTTAAACGTCTCCAAATAAGAAACG       |
| Edg-1bRT2C7R16  | AACCTCCCGACTTGCGGCGAGGCGTTTTAGC        |
| Edg-1bRT2C7R18  | TAAACCAAGTACCGCATTTCCAAGAACGGGTA       |
| Edg-1bRT2C7R20  | AGATAAGTCCTGAACACCTGTTTATCAACAA        |
| Edg-1bG2T3C7R00 | TGTAAAGTAATTCTGTCAAAGTACCGACAAAAG      |
| Edg-1bG2T3C7R02 | TAGTAGGGCTTAATTGAAAAGCCAACGCTCAAC      |
| Edg-1bG2T3C7R04 | GAATGGTTTGAAATACCCTTCTGACCTAAATTT      |
| Edg-1bG2T3C7R06 | AAGTCAATAGTGAATTTTTAAGACGCTGAGAAG      |
| Edg-5bRT1C7R00  | GGTGGCATCAATTCTAGGGCGCGAGCT            |
| Edg-5bRT1C7R02  | TCCCAATTCTGCGAACCCATATAACAG            |
| Edg-5bRT1C7R18  | GGGATTTTGCTAAACAAATGAATTTTC            |
| Edg-5bRT1C7R20  | ACAAACTACAACGCCTGAGTTTCGTCA            |
| Edg-5bRT2C7R00  | AGCCACCACCCTCATTGAACCGCCACC            |
| Edg-5bRT2C7R02  | GAGAGGGTTGATATAAGCGGATAAGTG            |
| Edg-5bRT2C7R18  | TAAACCAAGTACCGCATTTCCAAGAACG           |
| Edg-5bRT2C7R20  | AGATAAGTCCTGAACACCTGTTTATCA            |
| Edg-5bRT3C7R00  | GTAAGTAATTCTGTCAAAGTACCGAC             |
| Edg-5bRT3C7R02  | AGTAGGGCTTAATTGAAAAGCCAACGC            |
| Edg-5bRT3C7R18  | TTGATTAGTAATAACATTGTAGCAATA            |
| Edg-5bRT3C7R20  | AGGAACGGTACGCCAGTAAAGGGATTT            |
| Edg-5bRT4C7R00  | GAGCACGTATAACGTGCTATGGTTGCT            |
| Edg-5bRT4C7R02  | CGGGCGCTAGGGCGCTAAGAAAGCGAA            |
| Edg-5bRT4C7R18  | AAATTTTGTAGAACCCTTTCAACGCAAG           |
| Edg-5bRT4C7R20  | TAAGCAATAAAGCCTCAAAGAATTAGC            |
| Edg-5bG1T3C7R00 | CCAGTGTAAGTAATTCTGTCAAAGTACCGACAAAAG   |
| Edg-5bG1T3C7R02 | TGTATAGTAGGGCTTAATTGAAAAGCCAACGCTCAAC  |
| Edg-5bG1T3C7R18 | TTGATTTGATTAGTAATAACATTGTAGCAATACTTCT  |
| Edg-5bG1T3C7R20 | GAAAAAGGAACGGTACGCCAGTAAAGGGATTTTAGAC  |
| Edg-5bG2T4C7R00 | ACAATGAGCACGTATAACGTGCTATGGTTGCTTTGAC  |
| Edg-5bG2T4C7R02 | GGTATCGGGCGCTAGGGCGCTAAGAAAGCGAAAGGAG  |
| Edg-5bG2T4C7R18 | CCGTCAAATTTTTAGAACCCTTTCAACGCAAGGATAA  |
| Edg-5bG2T4C7R20 | CTCAGTAAGCAATAAAGCCTCAAAGAATTAGCAAAAT  |
| Edg-5bG3T1C7R00 | TAGACGGTGGCATCAATTCTAGGGCGCGAGCTGAAAA  |
| Edg-5bG3T1C7R02 | CTTCTTCCCAATTCTGCGAACCCTATATAACAGTTGAT |
| Edg-5bG3T1C7R18 | TCAACGGGATTTTGCTAAACAAATGAATTTTCTGTAT  |
| Edg-5bG3T1C7R20 | AAAAGACAACTACAACGCCTGAGTTTCGTCACCAGT   |
| Edg-5bG4T2C7R00 | AAAATAGCCACCACCCTCATTGAACCGCCACCCTCAG  |
| Edg-5bG4T2C7R02 | GATAAGAGAGGGTTGATATAAGCGGATAAGTGCCGTC  |

| Strand name     | Sequence                                                      |
|-----------------|---------------------------------------------------------------|
| Edg-5bG4T2C7R18 | AGGAGTAAACCAAGTACCGCATTCCAAGAACGGGTAT                         |
| Edg-5bG4T2C7R20 | TTGACAGATAAGTCCTGAACACCTGTTTATCAACAAT                         |
| Edg-5bC2G1T3R18 | TTGATTAGTAATAACATTGTAGCAATACTTCTTCCCA                         |
| Edg-5bC2G1T3R20 | AGGAACGGTACGCCAGTAAAGGGATTTTAGACGGTGG                         |
| Edg-5bC2G2T4R18 | AAATTTTGTAGAACCCTTTCAACGCAAGGATAAGAGAG                        |
| Edg-5bC2G2T4R20 | TAAGCAATAAAGCCTCAAAGAATTAGCAAAATAGCCA                         |
| Edg-5bC2G3T1R18 | GGGATTTTGCTAAACAAATGAATTTTCTGTATAGTAG                         |
| Edg-5bC2G3T1R20 | ACAAACTACAACGCCTGAGTTTCGTACCCAGTGTAAT                         |
| Edg-5bC2G4T2R18 | TAAACCAAGTACCGCATTCCAAGAACGGGTATCGGGC                         |
| Edg-5bC2G4T2R20 | AGATAAGTCCTGAACACCTGTTTATCAACAATGAGCA                         |
| Edg-5bC2RT1R00  | CATCAATTCTAGGGCGCGAGCTGAAAA                                   |
| Edg-5bC2RT1R02  | ATTCTGCGAACCCATATAACAGTTGAT                                   |
| Edg-5bC2RT2R00  | CCACCCTCATTGAACCGCCACCCTCAG                                   |
| Edg-5bC2RT2R02  | GGTTGATATAAGCGGATAAGTGCCGTC                                   |
| Edg-5bC2RT3R00  | GTAATTCTGTCAAAGTACCGACAAAAG                                   |
| Edg-5bC2RT3R02  | GGCTTAATTGAAAAGCCAACGCTCAAC                                   |
| Edg-5bC2RT4R00  | CGTATAACGTGCTATGGTTGCTTTGAC                                   |
| Edg-5bC2RT4R02  | GCTAGGGCGCTAAGAAAGCGAAAGGAG                                   |
| Edg-T1R02C7-DHP | GTGTCGTAGACACTCCCAATTCTGCGAACCCATATAACAGTTGATGTGTCGTAGACAC    |
| Edg-T1R06C7-DHP | GTGTCGTAGACACCCATAAATCAAAAATCCGAGAAACGAGAATGAGTGTGTCGTAGACAC  |
| Edg-T1R10C7-DHP | GTGTCGTAGACACGAAACACCAGAACGAGAGGCTTGCCCTGACGAGTGTGTCGTAGACAC  |
| Edg-T1R14C7-DHP | GTGTCGTAGACACGAACGAGGGTAGCAACGCGAAAGACAGCATCGGTGTGTCGTAGACAC  |
| Edg-T1R18C7-DHP | GTGTCGTAGACACGGGATTTTGCTAAACAAATGAATTTTCTGTATGTGTCGTAGACAC    |
| Edg-T2R02C7-DHP | GTGTCGTAGACACGAGAGGGTTGATATAAGCGGATAAGTGCCGTCGTGTCGTAGACAC    |
| Edg-T2R06C7-DHP | GTGTCGTAGACACGCGAGGTGACAGATTGTTGACAGGAGGTTGAGGTGTGTCGTAGACAC  |
| Edg-T2R10C7-DHP | GTGTCGTAGACACGCGCCAAAGACAAAAGTTCATATGGTTTACCAGTGTGTCGTAGACAC  |
| Edg-T2R14C7-DHP | GTGTCGTAGACACTTTTTTGTTTAACGTCCTCAAATAAGAAACGAGTGTGTCGTAGACAC  |
| Edg-T2R18C7-DHP | GTGTCGTAGACACTAAACCAAGTACCGCATTCCAAGAACGGGTATGTGTCGTAGACAC    |
| Edg-T3R02C7-DHP | GTGTCGTAGACACAGTAGGGCTTAATTGAAAAGCCAACGCTCAACGTGTGTCGTAGACAC  |
| Edg-T3R06C7-DHP | GTGTCGTAGACACAGTCAATAGTGAATTTTAAGACGCTGAGAAGGTGTGTCGTAGACAC   |
| Edg-T3R10C7-DHP | GTGTCGTAGACACCAATATAATCCTGATTGATGATGGCAATTCATGTGTCGTAGACAC    |
| Edg-T3R14C7-DHP | GTGTCGTAGACACACATCGCCATTAAAAAAACTGATAGCCCTAAAGTGTGTCGTAGACAC  |
| Edg-T3R18C7-DHP | GTGTCGTAGACACTTGATTAGTAATAACATTGTAGCAATACTTCTGTGTCGTAGACAC    |
| Edg-T4R02C7-DHP | GTGTCGTAGACACCGGGCGCTAGGGCGCTAAGAAAGCGAAAGGAGGTGTGTCGTAGACAC  |
| Edg-T4R06C7-DHP | GTGTCGTAGACACATCCTGTTTGTATGGTGGCCCCAGCAGGCGAAAGTGTGTCGTAGACAC |
| Edg-T4R10C7-DHP | GTGTCGTAGACACGTAACGCCAGGGTTTTAAGGCGATTAAGTTGGGTGTGTCGTAGACAC  |
| Edg-T4R14C7-DHP | GTGTCGTAGACACTTTAAATTGTAACGTAATTGTATAAGCAAATAGTGTGTCGTAGACAC  |
| Edg-T4R18C7-DHP | GTGTCGTAGACACAAATTTTTAGAACCCCTTTCAACGCAAGGATAAGTGTGTCGTAGACAC |
| Edg-T3C7R20     | AGGAACGGTACGCCAGTAAAGGGATTTTAGAC                              |
| Edg-ROX-T2C7R00 | /5Rox-N/AGCCACCACCCTCATTGAACCGCCACCCTCAG                      |
| Edg-T3C7R20-Q   | AGGAACGGTACGCCAGTAAAGGGATTTTAGAC/3IAbRQ/                      |
| Edg-TYE-T2C7R00 | /5TYE563/AGCCACCACCCTCATTGAACCGCCACCCTCAG                     |
| Edg-T4C7R14-ROX | AGTTTAAATTGTAAACGTATTGTATAAGCAAATA/3Rox-N/                    |
| Edg-Q-T2C7R06   | /5IAbRQ/GCAGGTACAGCATTTGTTGACAGGAGGTTG                        |
| Edg-T3C7R16-ROX | TCGTCTGAAATGGATTACATTTTGACGCTC/3Rox-N/                        |
| Edg-Q-T1C7R04   | /5IAbRQ/AAATTGCTCCTTTTGATATTAGAGAGTACCTTTA                    |
| Edg-ROX-T2C7R00 | /56-ROXN/ATAGCCACCACCCTCATTGAACCGCCACCCTCAG                   |
| Edg-T4C7R20-Q   | TAAGCAATAAAGCCTCAAAGAATTAGCAAA/3IAbRQSp/                      |

Supplementary Table 4 | Pattern staples.

| Strand name      | Sequence                                                  |
|------------------|-----------------------------------------------------------|
| ssEx-Reg-T1R01C6 | TCATTTGCTAATAGTAGTAGCATTTTTTTTTTTTTTTTTTTTTT              |
| ssEx-Reg-T1R03C5 | CAACTAAAGTACGGTGGGATGGCTTTTTTTTTTTTTTTTTTTTT              |
| ssEx-Reg-T1R03C6 | TTTCATTGAGTAGATTTAGTTTCTATATTTTTTTTTTTTTTTTTT             |
| ssEx-Reg-T1R04C5 | TAGAGCTTCAGACCGGAAGCAAACCTATTATATTTTTTTTTTTTTT            |
| ssEx-Reg-T1R05C6 | GTCAGGAAGAGGTCATTTTGTCTGGAAGTTTTTTTTTTTTTTTTT             |
| ssEx-Reg-T1R06C3 | TTAAGAGGGTCCAATACTGCGGATAGCGAGTTTTTTTTTTTTTTTTT           |
| ssEx-Reg-T1R06C5 | GTCAGAAGATTGAATCCCCCTCAACCTCGTTTTTTTTTTTTTTTTT            |
| ssEx-Reg-T1R07C4 | AAATATTCCAAAGCGGATTGCATCGAGCTTCATTTTTTTTTTTTTT            |
| ssEx-Reg-T1R07C6 | AACAGTTAGGTCTTTACCCTGATCCAACAGTTTTTTTTTTTTTTTTT           |
| ssEx-Reg-T1R08C3 | AGGCTTTTCAGGTAGAAAGATTCAATTACCTTTTTTTTTTTTTTTTTT          |
| ssEx-Reg-T1R08C5 | ACCAGACGGAATACCACATTCAACGAGATGGTTTTTTTTTTTTTTTTT          |
| ssEx-Reg-T1R09C2 | CATTATTAGCAAAAGAAGTTTGTCTTTTTTTTTTTTTTTTTTTTT             |
| ssEx-Reg-T1R09C4 | AGATTTAGACGATAAAAAACCAAAATCGTCATTTTTTTTTTTTTTTTTT         |
| ssEx-Reg-T1R09C6 | ATACATAACAACACTATCATAACATGCTTTATTTTTTTTTTTTTTTTTT         |
| ssEx-Reg-T1R10C1 | AGTCAGGACATAGGCTGGCTGACCTTTGAAAGTTTTTTTTTTTTTTTTT         |
| ssEx-Reg-T1R10C3 | TTATGCGATTGACAAGAACCGGAGGTCAATTTTTTTTTTTTTTTTTT           |
| ssEx-Reg-T1R10C5 | TTAATTTCCAACGTAACAAAGCTGTCCATGTTTTTTTTTTTTTTTTT           |
| ssEx-Reg-T1R11C2 | GAGTAATCTTTAAGAAGCTGGCTCCGGAACAATTTTTTTTTTTTTTTTTT        |
| ssEx-Reg-T1R11C4 | ACCCAAATAACTTTAATCATTGTGATCAGTTGTTTTTTTTTTTTTTTTT         |
| ssEx-Reg-T1R11C6 | GTGAATATAGTAAATTGGGCTTTAATGCAGTTTTTTTTTTTTTTTTT           |
| ssEx-Reg-T1R12C3 | CATAAGGGACACTAAAACACTCACATTAAATTTTTTTTTTTTTTTTTT          |
| ssEx-Reg-T1R12C5 | ACTTAGCCATTATACCAAGCGCGAGAGGACTATTTTTTTTTTTTTTTTTT        |
| ssEx-Reg-T1R13C2 | AAAAGAATAACCGAAGTACCAACTTCATCAATTTTTTTTTTTTTTTTTT         |
| ssEx-Reg-T1R13C4 | CCCCAGCGGGAACGAGGCGCAGACTATTCATTTTTTTTTTTTTTTTTT          |
| ssEx-Reg-T1R13C6 | ACAACGGAATCCGCGACCTGCCTCATTTTTTTTTTTTTTTTTTTTTT           |
| ssEx-Reg-T1R14C3 | CGGGTAAAATTCGGTCGCTGAGGAATGACATTTTTTTTTTTTTTTTTT          |
| ssEx-Reg-T1R14C5 | AAGACTTTGGCCGCTTTTGGCGGATTAAACAGTTTTTTTTTTTTTTTTT         |
| ssEx-Reg-T1R15C4 | GAGTTAAATTCATGAGGAAGTTTCTCTTGACTTTTTTTTTTTTTTTTTT         |
| ssEx-Reg-T1R15C6 | CTCAGCAGGCTACAGAGGCTTTAACAAAGTTTTTTTTTTTTTTTTTTTT         |
| ssEx-Reg-T1R16C5 | CTTGATACTGAAAATCTCCAAAAAAGCGGAGTTTTTTTTTTTTTTTTT          |
| ssEx-Reg-T1R17C4 | TTTCACGTCGATAGTTGCCCGACCTTGCAGGTTTTTTTTTTTTTTTTT          |
| ssEx-Reg-T1R17C6 | CAAAAGGTTTCGAGGTGAATTTCTCGTCACCTTTTTTTTTTTTTTTTTT         |
| ssEx-Reg-T1R19C6 | GTTAGTAACCTTCAACAGTTTCAAAGGCTCTTTTTTTTTTTTTTTTTT          |
| ssEx-Reg-T1R21C5 | CCATGTACCGTAACACTGTAGCATTCACAGATTCCAGACTTTTTTTTTTTTTTTTTT |
| ssEx-Reg-T2R01C6 | ACCCTCATTACGGGATAGCAAGCCTTTTTTTTTTTTTTTTTTTTTT            |
| ssEx-Reg-T2R03C5 | TTAGGATTAGCGGGGTGGAACCTATTTTTTTTTTTTTTTTTTTTTT            |
| ssEx-Reg-T2R03C6 | GTACCAAGTATAGCCCGGAATAGAACCCTTTTTTTTTTTTTTTTTTTTT         |
| ssEx-Reg-T2R04C5 | TTATTCTGACTGGTAATAAGTTTTTAACAAATATTTTTTTTTTTTTTTTTT       |
| ssEx-Reg-T2R05C6 | CAGTGCCCCCCTGCCTATTTCTTTGCTCATTTTTTTTTTTTTTTTTTTTT        |
| ssEx-Reg-T2R06C3 | GTCTCTGACACCCCTCAGAGCCACATCAAAATTTTTTTTTTTTTTTTTTTTT      |
| ssEx-Reg-T2R06C5 | AATCCTCAACCAGAACCACCAGCCCCCTTTTTTTTTTTTTTTTTTTTTT         |
| ssEx-Reg-T2R07C4 | GAGCCGCCTTAAAGCCAGAATGGAGATGATACTTTTTTTTTTTTTTTTTTTTT     |
| ssEx-Reg-T2R07C6 | GCCAGCAGCCTTGATATTCAAAACGGGGTTTTTTTTTTTTTTTTTTTTT         |
| ssEx-Reg-T2R08C3 | TCACCGGAAACGTACCAATGAATTATTCATTTTTTTTTTTTTTTTTTTTT        |
| ssEx-Reg-T2R08C5 | ATTAGCGTCCGTAATCAGTAGCGAATTGAGGGTTTTTTTTTTTTTTTTTTTT      |
| ssEx-Reg-T2R09C2 | AGGCCGGAACCAGAGCCACCACCGTTTTTTTTTTTTTTTTTTTTTTTT          |
| ssEx-Reg-T2R09C4 | TAGCAGCATTTGCCATCTTTTCATACACCCCTCATTTTTTTTTTTTTTTTTTTTT   |
| ssEx-Reg-T2R09C6 | AGTTTGGCATTTTTCGGTCATAGAGCCGCCTTTTTTTTTTTTTTTTTTTTT       |
| ssEx-Reg-T2R10C1 | GCCATTTGCAAACGTAGAAAATACCTGGCATGTTTTTTTTTTTTTTTTTTTT      |
| ssEx-Reg-T2R10C3 | TTAAAGGTACATATAAAAGAAACAAACGCATTTTTTTTTTTTTTTTTTTTT       |
| ssEx-Reg-T2R10C5 | AGGGAAGGATAAGTTTATTTTGTGTCAGCCGAACCTTTTTTTTTTTTTTTTTTTTT  |
| ssEx-Reg-T2R11C2 | AGGTGGCAGAATTATACCGTCACCATTAGCATTTTTTTTTTTTTTTTTTTTT      |
| ssEx-Reg-T2R11C4 | ACCACGGATAAATATTGACGGAAAACCATCGATTTTTTTTTTTTTTTTTTTTT     |
| ssEx-Reg-T2R11C6 | TAGAAAAGGCGACATTCAACCGCAGAATCATTTTTTTTTTTTTTTTTTTTT       |
| ssEx-Reg-T2R12C3 | ATAATAACTCAGAGAGATAACCCGAAGCGCTTTTTTTTTTTTTTTTTTTTT       |



| Strand name      | Sequence                                                |
|------------------|---------------------------------------------------------|
| ssEx-Reg-T2R12C5 | AAAGTTACGCCCAATAATAAGAGCAGCCTTTATTTTTTTTTTTTTTTTTTTT    |
| ssEx-Reg-T2R13C2 | CGCTAATAGGAATACCCAAAAGAAATACATAATTTTTTTTTTTTTTTTTTTT    |
| ssEx-Reg-T2R13C4 | TGAGTTAACAGAAGGAAACCGAGGGCAAAGACTTTTTTTTTTTTTTTTTTTT    |
| ssEx-Reg-T2R13C6 | ATGAAATGAAAAGTAAGCAGATACAATCAATTTTTTTTTTTTTTTTTTTT      |
| ssEx-Reg-T2R14C3 | ATTAGACGGAGCGTCTTTCCAGAGCTACAATTTTTTTTTTTTTTTTTTTT      |
| ssEx-Reg-T2R14C5 | CAGAGAGAACAAAATAAACAGCCATTAAATCATTTTTTTTTTTTTTTTTTTT    |
| ssEx-Reg-T2R15C4 | TGCCAGTTATAACATAAAAAACAGGACAAGAATTTTTTTTTTTTTTTTTTTT    |
| ssEx-Reg-T2R15C6 | ATCCCAAAAAAATGAAAATAGCAAGAAACATTTTTTTTTTTTTTTTTTTT      |
| ssEx-Reg-T2R16C5 | AGATTAGTATATAGAAGGCTTATCCAAGCCGTTTTTTTTTTTTTTTTTTT      |
| ssEx-Reg-T2R17C4 | CAAATCAGTGTCTATTTTGCACCCAGCCTAATTTTTTTTTTTTTTTTTTTT     |
| ssEx-Reg-T2R17C6 | TAAGAACGGAGGTTTTGAAGCCTATTATTTTTTTTTTTTTTTTTTTT         |
| ssEx-Reg-T2R19C6 | CTTATCACTCATCGAGAACAAGCGGTATTCTTTTTTTTTTTTTTTTTTTT      |
| ssEx-Reg-T2R21C5 | AGCTAATGCAGAACGCGAGAAAAATAATATCCTGTCTTCTTTTTTTTTTTTTTTT |
| ssEx-Reg-T3R01C6 | AGAATATCAGACGACGACAATAAATTTTTTTTTTTTTTTTTTTT            |
| ssEx-Reg-T3R03C5 | TCATATGCGTTATACAAAGGCGTTTTTTTTTTTTTTTTTTTTTT            |
| ssEx-Reg-T3R03C6 | CCAGTATGAATCGCCATATTTAGTAATAAGTTTTTTTTTTTTTTTTTTT       |
| ssEx-Reg-T3R04C5 | AAATAAGAACTTTTTCAAATATATCTGAGAGATTTTTTTTTTTTTTTTTTTT    |
| ssEx-Reg-T3R05C6 | ATTTTCATGACCGTGTGATAAATAATTCTTATTTTTTTTTTTTTTTTTTTT     |
| ssEx-Reg-T3R06C3 | TATATAACGTAAATCGTCGCTATATTTGAATTTTTTTTTTTTTTTTTTTT      |
| ssEx-Reg-T3R06C5 | CTACCTTTAGAATCCTTGAAAACAAGAAAACATTTTTTTTTTTTTTTTTTTT    |
| ssEx-Reg-T3R07C4 | TTTCCCTTTTAACCTCCGGCTTAGCAAAGAACTTTTTTTTTTTTTTTTTTTT    |
| ssEx-Reg-T3R07C6 | GCTTAGAATCAAAATCATAGGTTTTAGTTATTTTTTTTTTTTTTTTTTTT      |
| ssEx-Reg-T3R08C3 | TTACCTTTACAATAACGGATTTCGCAAAATTTTTTTTTTTTTTTTTTTT       |
| ssEx-Reg-T3R08C5 | AAATTAATACCAAGTTACAAAATCCTGAATAATTTTTTTTTTTTTTTTTTTT    |
| ssEx-Reg-T3R09C2 | CGGGAGAATTTAATGGAAACAGTATTTTTTTTTTTTTTTTTTTT            |
| ssEx-Reg-T3R09C4 | CTTTGAATTACATTTAACAATTTCTAATTAATTTTTTTTTTTTTTTTTTTT     |
| ssEx-Reg-T3R09C6 | GCGAATTATGAAACAAACATCATAGCGATATTTTTTTTTTTTTTTTTTTT      |
| ssEx-Reg-T3R10C1 | GTAGATTTGTTATTAATTTTAAAAACAATTCCTTTTTTTTTTTTTTTTTTTT    |
| ssEx-Reg-T3R10C3 | ATTTGCACCATTTTGCGGAACAAATTTGAGTTTTTTTTTTTTTTTTTTT       |
| ssEx-Reg-T3R10C5 | TGGAAGGGAGCGGAATTATCATCAACTAATAGTTTTTTTTTTTTTTTTTTT     |
| ssEx-Reg-T3R11C2 | AACATTATGTAAAACAGAAATAAATTTTACATTTTTTTTTTTTTTTTTTTT     |
| ssEx-Reg-T3R11C4 | CCAGAAGGTTAGAACCTACCATATCCTGATTGTTTTTTTTTTTTTTTTTTT     |
| ssEx-Reg-T3R11C6 | ATTATCAGTTTGGATTATACTTGCGCAGAGTTTTTTTTTTTTTTTTTTT       |
| ssEx-Reg-T3R12C3 | GATTTAGATTGCTGAACCTCAAAGTATTAATTTTTTTTTTTTTTTTTTTT      |
| ssEx-Reg-T3R12C5 | ATTAGAGCAATATCTGGTCAGTTGCAGCAGAATTTTTTTTTTTTTTTTTTTT    |
| ssEx-Reg-T3R13C2 | GCATCACCAGTATTAGACTTTACAGTTTGAGTTTTTTTTTTTTTTTTTTT      |
| ssEx-Reg-T3R13C4 | CCTCAATCCGTCAATAGATAATACAGAAACCATTTTTTTTTTTTTTTTTTTTT   |
| ssEx-Reg-T3R13C6 | ACAGTTGTTAGGAGCACTAACATATTCCTGTTTTTTTTTTTTTTTTTTT       |
| ssEx-Reg-T3R14C3 | CACCGCCTGAAAGCGTAAGAATACATTCTGTTTTTTTTTTTTTTTTTTT       |
| ssEx-Reg-T3R14C5 | GATAAACTTTTTGAATGGCTATTTTCACCAGTTTTTTTTTTTTTTTTTTT      |
| ssEx-Reg-T3R15C4 | AGACAATAAGAGGTGAGGCGTCATATCAAACCTTTTTTTTTTTTTTTTTTTT    |
| ssEx-Reg-T3R15C6 | ATGCGCGTACCGAACGAACCACGCAATCATTTTTTTTTTTTTTTTTTTT       |
| ssEx-Reg-T3R16C5 | TCACACGATGCAACAGGAAAAACGGAAGAACTTTTTTTTTTTTTTTTTTTT     |
| ssEx-Reg-T3R17C4 | CCAGCCATCCAGTAATAAAGGGACGTGGCACTTTTTTTTTTTTTTTTTTTT     |
| ssEx-Reg-T3R17C6 | AATACCTATTTACATTGGCAGAAGTCTTTATTTTTTTTTTTTTTTTTTTT      |
| ssEx-Reg-T3R19C6 | TTAACCGTCACTTGCCCTGAGTACTCATGGATTTTTTTTTTTTTTTTTTTT     |
| ssEx-Reg-T3R21C5 | CTAAACAGGAGGCCGATAATCCTGAGAAGTGTCACGCAATTTTTTTTTTTTTTTT |
| ssEx-Reg-T4R01C6 | GCGCGTACTTTCCCTCGTTAGAATCTTTTTTTTTTTTTTTTTTTT           |
| ssEx-Reg-T4R03C5 | AAAGCCGGCGAACGTGTGCCGTAATTTTTTTTTTTTTTTTTTTT            |
| ssEx-Reg-T4R03C6 | GGAAGGGGCAAGTGTAGCGGTGCTACAGGTTTTTTTTTTTTTTTTTTT        |
| ssEx-Reg-T4R04C5 | AGCACTAAAAAGGGCGAAAAACCGAAATCCCTTTTTTTTTTTTTTTTTTTT     |
| ssEx-Reg-T4R05C6 | GGCGATGTTTTTGGGGTCGAGGGCGAGAAATTTTTTTTTTTTTTTTTTTT      |
| ssEx-Reg-T4R06C3 | TGAGTGTTTCAGCTGATTGCCCTTGCGCGGGTTTTTTTTTTTTTTTTTTT      |
| ssEx-Reg-T4R06C5 | TATAAATCGAGAGTTGCAGCAAGCGTCGTGCCTTTTTTTTTTTTTTTTTTTT    |
| ssEx-Reg-T4R07C4 | GGCCCTGAAAAAGAATAGCCCGAGCGTGGACTTTTTTTTTTTTTTTTTTTT     |
| ssEx-Reg-T4R07C6 | CTGGTTTGTTCCGAAATCGGCATCTATCAGTTTTTTTTTTTTTTTTTTT       |
| ssEx-Reg-T4R08C3 | GAGAGGCGACAACATACGAGCCGCTGCAGTTTTTTTTTTTTTTTTTTT        |

| Strand name      | Sequence                                                |
|------------------|---------------------------------------------------------|
| ssEx-Reg-T4R08C5 | AGCTGCATAGCCTGGGGTGCCTAAGTAAAACGTTTTTTTTTTTTTTTTTTTT    |
| ssEx-Reg-T4R09C2 | AATTCACGTTTGCGTATTGGGCGTTTTTTTTTTTTTTTTTTTT             |
| ssEx-Reg-T4R09C4 | AAGTGTAATAATGAATCGGCCAACCCACGCCTTTTTTTTTTTTTTTTTTTT     |
| ssEx-Reg-T4R09C6 | CTAACTCCCAGTCGGGAAACCTGGTCCACGTTTTTTTTTTTTTTTTTTTT      |
| ssEx-Reg-T4R10C1 | GAATTCGTGCCATTCCGCCATTCAGTTCCGGCATTTTTTTTTTTTTTTTTTTT   |
| ssEx-Reg-T4R10C3 | TCGACTCTGAAGGGCGATCGGTGCGGCCTCTTTTTTTTTTTTTTTTTTTTT     |
| ssEx-Reg-T4R10C5 | ACGGCCAGTACGCCAGCTGGCGAACATCTGCCTTTTTTTTTTTTTTTTTTTTT   |
| ssEx-Reg-T4R11C2 | ACTGTTGGAGAGGATCCCCGGTACCGCTCACTTTTTTTTTTTTTTTTTTTTT    |
| ssEx-Reg-T4R11C4 | TTCGCTATTGCCAAGCTTGCATGCGAAGCATATTTTTTTTTTTTTTTTTTTTT   |
| ssEx-Reg-T4R11C6 | GTGCTGCCCCAGTCACGACGTTTGAGTGAGTTTTTTTTTTTTTTTTTTTT      |
| ssEx-Reg-T4R12C3 | AGGAAGATCATTAATGTGAGCGTTTTTAATTTTTTTTTTTTTTTTTTTTT      |
| ssEx-Reg-T4R12C5 | AGTTTGAGATTCTCCGTGGGAACAATTCGCATTTTTTTTTTTTTTTTTTTTT    |
| ssEx-Reg-T4R13C2 | TTCATCAACGCACTCCAGCCAGCTGCTGCGCATTTTTTTTTTTTTTTTTTTTT   |
| ssEx-Reg-T4R13C4 | CCCGTCGGGGACGACGACAGTATCGGGCCTCTTTTTTTTTTTTTTTTTTTTT    |
| ssEx-Reg-T4R13C6 | ATTGACCCGCATCGTAACCGTGAGGGGGATTTTTTTTTTTTTTTTTTTTT      |
| ssEx-Reg-T4R14C3 | CCAATAGGAACTAGCATGTCAAGGAGCAATTTTTTTTTTTTTTTTTTTTT      |
| ssEx-Reg-T4R14C5 | TAAATTTTGTAAATCAGAAAAGCACAAGGCTTTTTTTTTTTTTTTTTTTTT     |
| ssEx-Reg-T4R15C4 | ACCCCGGTTGTTAAATCAGCTCATAGTAACAATTTTTTTTTTTTTTTTTTTTT   |
| ssEx-Reg-T4R15C6 | CAGGAAGTAATATTTTGTTAAAAACGGCGGTTTTTTTTTTTTTTTTTTTT      |
| ssEx-Reg-T4R16C5 | TATCAGGTAAATCACCATCAATATCAATGCCTTTTTTTTTTTTTTTTTTTTT    |
| ssEx-Reg-T4R17C4 | AGACAGTCCATTGCCTGAGAGTCTTCATATGTTTTTTTTTTTTTTTTTTTT     |
| ssEx-Reg-T4R17C6 | ACCGTTCATTTTGTAGAGATCTCCCAAAAATTTTTTTTTTTTTTTTTTTTT     |
| ssEx-Reg-T4R19C6 | CCTTTATCATATATTTTAAATGGATATTCATTTTTTTTTTTTTTTTTTTTT     |
| ssEx-Reg-T4R21C5 | AATCATACAGGCAAGGCAGAGCATAAAGCTAAGGAGAAGTTTTTTTTTTTTTTTT |

Supplementary Table 5 | Negation strands.

| Strand name | Sequence                          |
|-------------|-----------------------------------|
| Neg-T1R00C7 | TTTTCAGCTCGCGCCCTAGAAATTGATGCCACC |
| Neg-T1R02C7 | ATCAACTGTTATATGGGTTCGCAGAATTGGGA  |
| Neg-T1R04C7 | TAAAGGTACTCTCTAATATCAAAAGGAGCAAT  |
| Neg-T1R06C7 | TCATTCTCGTTTTCTGGATTTTTGATTATGG   |
| Neg-T1R08C7 | TAATTCCTTTTGGCGTCTCTTACTATGCCTCG  |
| Neg-T1R10C7 | TCGTCAGGGCAAGCCTCTCGTTCGTGTTTC    |
| Neg-T1R12C7 | GCGATGATACAAAATCTCGACACAATTTATCAG |
| Neg-T1R14C7 | CGATGCTGTCTTTCGCGTTGCTACCCTCGTTC  |
| Neg-T1R16C7 | GATACAATTAAAGGCTAGCAAGCTGATAAACC  |
| Neg-T1R18C7 | ATACAGAAAATTCATTTGTTTAGCAAAAATCCC |
| Neg-T1R20C7 | ACTGGTGACGAAACTCAGGCGTTGTAGTTTGT  |
| Neg-T2R00C7 | CTGAGGGTGGCGGTTCAATGAGGGTGGTGGCT  |
| Neg-T2R02C7 | GACGGCACTTATCCGCTTATATCAACCCTCTC  |
| Neg-T2R04C7 | GGGCACTGTTACTCAACATTAAGTGTATAC    |
| Neg-T2R06C7 | CTCAACCTCCTGTCAACAATCGTCTGACCTGC  |
| Neg-T2R08C7 | CAGTCTGACGCTAAAGCGATGAAAACGCGCTA  |
| Neg-T2R10C7 | TGGTAAACCATATGAACTTTGTCTTTGGCGC   |
| Neg-T2R12C7 | TAAGATAGCTATTGCTTTAAAAAGGGCTTCGG  |
| Neg-T2R14C7 | TCGTTTCTTATTTGGAGACGTTAAACAAAAAA  |
| Neg-T2R16C7 | CGCTAAACGCCTCGCCGCAAGTCGGGAGGTT   |
| Neg-T2R18C7 | ATACCCGTTCTTGAATGCGGTACTTGGTTTA   |
| Neg-T2R20C7 | ATTGTTGATAAACAGGTGTTCAAGACTTATCT  |
| Neg-T3R00C7 | CTTTTGTGCGTACTTTTGACAGAATTACTTTAC |
| Neg-T3R02C7 | GTTGAGCGTTGGCTTTTCAATTAAGCCCTACT  |
| Neg-T3R04C7 | AAATTTAGGTCAGAAGGGTATTTCAAACCATT  |
| Neg-T3R06C7 | CTTCTCAGCGTCTTAAAAATTCATTATTGACT  |
| Neg-T3R08C7 | GGTAATTGAAATGAATCATCTTCTTTTGCTCA  |
| Neg-T3R10C7 | ATGAATTGCCATCATCAATCAGGATTATATTG  |
| Neg-T3R12C7 | CTTCCTCAATTCCTTTAGATATTTTAGATAAC  |
| Neg-T3R14C7 | TTTAGGGCTATCAGTTTTTTTAATGGCGATGT  |
| Neg-T3R16C7 | TTGAGCGTCAAAATGTAATCCATTTTCAGACGA |
| Neg-T3R18C7 | AGAAGTATTGCTACAATGTTATTACTAATCAA  |
| Neg-T3R20C7 | GTCTAAATCCCTTTACTGGCGTACCGTTCCT   |
| Neg-T4R00C7 | GTCAAAGCAACCATAGCAGTTATACGTGCTC   |
| Neg-T4R02C7 | CTCCTTTTCGCTTCTTAGCGCCCTAGCGCCCG  |
| Neg-T4R04C7 | GGTTCACGTAGTGGGCACTTGATTTGGGTGAT  |
| Neg-T4R06C7 | TTTCGCCTGCTGGGGCCACCATCAAACAGGAT  |
| Neg-T4R08C7 | GCAACGCAATTAATGTAAAGCGGGCAGTGAGC  |
| Neg-T4R10C7 | CCAACTTAATCGCCTTAAAAACCCTGGCGTTAC |
| Neg-T4R12C7 | TGACCTATCCCATTACCCCATCTACACCAACG  |
| Neg-T4R14C7 | TATTTGCTTATACAATACGTTTACAATTTAAA  |
| Neg-T4R16C7 | ATTAATTTATCAGCTAAGCTACCCTCTCCGGC  |
| Neg-T4R18C7 | TTATCCTTGCGTTGAAAGGGTTCTAAAAATTT  |
| Neg-T4R20C7 | ATTTTGCTAATCTTTGAGGCTTTATTGCTTA   |



## Supplementary References

- [1] Tikhomirov, G., Petersen, P. & Qian, L. Triangular DNA origami tilings. *Journal of the American Chemical Society* DOI: 10.1021/jacs.8b10609 (to appear).
- [2] Papoulis, A. & Pillai, S. U. *Probability, random variables, and stochastic processes* (Tata McGraw-Hill Education, 2002).
- [3] Petersen, P. Yield Calculator. <http://qianlab.caltech.edu/YieldCalculator> (2016).
- [4] Soloveichik, D. CRNSimulator. <http://users.ece.utexas.edu/~soloveichik/crn simulator.html> (2009).
- [5] Wetmur, J. G. Hybridization and renaturation kinetics of nucleic acids. *Annual Review of Biophysics and Bioengineering* **5**, 337–361 (1976).
- [6] Tikhomirov, G., Petersen, P. & Qian, L. Programmable disorder in random DNA tilings. *Nature Nanotechnology* **12**, 251–259 (2017).
- [7] Tikhomirov, G., Petersen, P. & Qian, L. Fractal assembly of micrometre-scale DNA origami arrays with arbitrary patterns. *Nature* **552**, 67–71 (2017).
- [8] Marras, A. E., Zhou, L., Su, H.-J. & Castro, C. E. Programmable motion of DNA origami mechanisms. *Proceedings of the National Academy of Sciences* **112**, 713–718 (2015).
- [9] Gerling, T., Wagenbauer, K. F., Neuner, A. M. & Dietz, H. Dynamic DNA devices and assemblies formed by shape-complementary, non-base pairing 3D components. *Science* **347**, 1446–1452 (2015).
- [10] Yan, H., Zhang, X., Shen, Z. & Seeman, N. C. A robust DNA mechanical device controlled by hybridization topology. *Nature* **415**, 62–65 (2002).
- [11] Han, D., Pal, S., Liu, Y. & Yan, H. Folding and cutting DNA into reconfigurable topological nanostructures. *Nature Nanotechnology* **5**, 712–717 (2010).
- [12] Goodman, R. P. *et al.* Reconfigurable, braced, three-dimensional DNA nanostructures. *Nature Nanotechnology* **3**, 93–96 (2008).
- [13] Douglas, S. M., Bachelet, I. & Church, G. M. A logic-gated nanorobot for targeted transport of molecular payloads. *Science* **335**, 831–834 (2012).
- [14] Song, J. *et al.* Reconfiguration of DNA molecular arrays driven by information relay. *Science* **357**, eaan3377 (2017).
- [15] Maune, H. T. *et al.* Self-assembly of carbon nanotubes into two-dimensional geometries using DNA origami templates. *Nature Nanotechnology* **5**, 61–66 (2010).
- [16] Knudsen, J. B. *et al.* Routing of individual polymers in designed patterns. *Nature Nanotechnology* **10**, 892–898 (2015).
- [17] Pal, S., Deng, Z., Ding, B., Yan, H. & Liu, Y. DNA-origami-directed self-assembly of discrete silver-nanoparticle architectures. *Angewandte Chemie International Edition* **49**, 2700–2704 (2010).
- [18] Pal, S. *et al.* DNA directed self-assembly of anisotropic plasmonic nanostructures. *Journal of the American Chemical Society* **133**, 17606–17609 (2011).
- [19] Engheta, N. Circuits with light at nanoscales: optical nanocircuits inspired by metamaterials. *Science* **317**, 1698–1702 (2007).
- [20] Deng, Z., Samanta, A., Nangreave, J., Yan, H. & Liu, Y. Robust DNA-functionalized core/shell quantum dots with fluorescent emission spanning from UV–vis to near-IR and compatible with DNA-directed self-assembly. *Journal of the American Chemical Society* **134**, 17424–17427 (2012).
- [21] Lent, C. S., Isaksen, B. & Lieberman, M. Molecular quantum-dot cellular automata. *Journal of the American Chemical Society* **125**, 1056–1063 (2003).

- [22] Imre, A. *et al.* Majority logic gate for magnetic quantum-dot cellular automata. *Science* **311**, 205–208 (2006).
- [23] Wang, J., Zhou, Z., Yue, L., Wang, S. & Willner, I. Switchable triggered interconversion and reconfiguration of DNA origami dimers and their use for programmed catalysis. *Nano Letters* **18**, 2718–2724 (2018).
- [24] Sherman, W. B. & Seeman, N. C. A precisely controlled DNA biped walking device. *Nano Letters* **4**, 1203–1207 (2004).
- [25] Shin, J.-S. & Pierce, N. A. A synthetic DNA walker for molecular transport. *Journal of the American Chemical Society* **126**, 10834–10835 (2004).
- [26] Yin, P., Yan, H., Daniell, X. G., Turberfield, A. J. & Reif, J. H. A unidirectional DNA walker that moves autonomously along a track. *Angewandte Chemie International Edition* **43**, 4906–4911 (2004).
- [27] Bath, J., Green, S. J. & Turberfield, A. J. A free-running DNA motor powered by a nicking enzyme. *Angewandte Chemie International Edition* **117**, 4432–4435 (2005).
- [28] Schiefer, N. & Winfree, E. Universal computation and optimal construction in the chemical reaction network-controlled tile assembly model. *Lecture Notes in Computer Science* **9211**, 34–54 (2015).
- [29] Zhang, D. Y., Hariadi, R. F., Choi, H. M. & Winfree, E. Integrating DNA strand-displacement circuitry with DNA tile self-assembly. *Nature Communications* **4**, 1965 (2013).
- [30] Stojanovic, M. N. & Stefanovic, D. A deoxyribozyme-based molecular automaton. *Nature Biotechnology* **21**, 1069–1074 (2003).
- [31] Qian, L. & Winfree, E. Parallel and scalable computation and spatial dynamics with DNA-based chemical reaction networks on a surface. *Lecture Notes in Computer Science* **8727**, 114–131 (2014).
- [32] Thubagere, A. J. *et al.* A cargo-sorting DNA robot. *Science* **357**, eaan6558 (2017).
